# Supplementary material
Source: publisher site journal article supplement (https://www.dovepress.com/article/337635)
Supplement: Supplementary file 1 [file get_supplementary_file.php]

**Supplementary Figure 1**

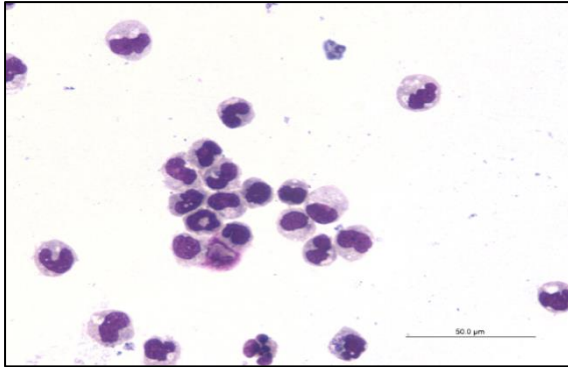

**Supplementary Figure 1:** Photomicrograph of CD14+ monocytes isolated from blood cells of COPD patients and stained with Giemsa. x40

## Supplementary Figure 2

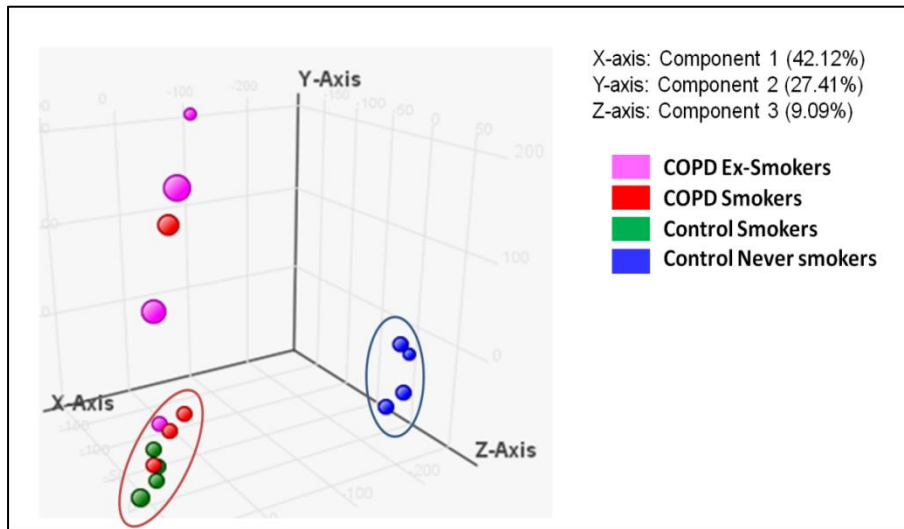

**Supplementary Figure 2:** Principal Component Analysis (PCA) of all (n=16) samples [COPD (n = 8) and Control (n = 8)]. The X-axis refers to the PCA component 1 with 42.12% variance. The Y axis refers to the PCA component 2 with 27.41% variance and the Z-axis refers to PCA component 3 with 9.09% variance.

**Supplementary Figure 3**

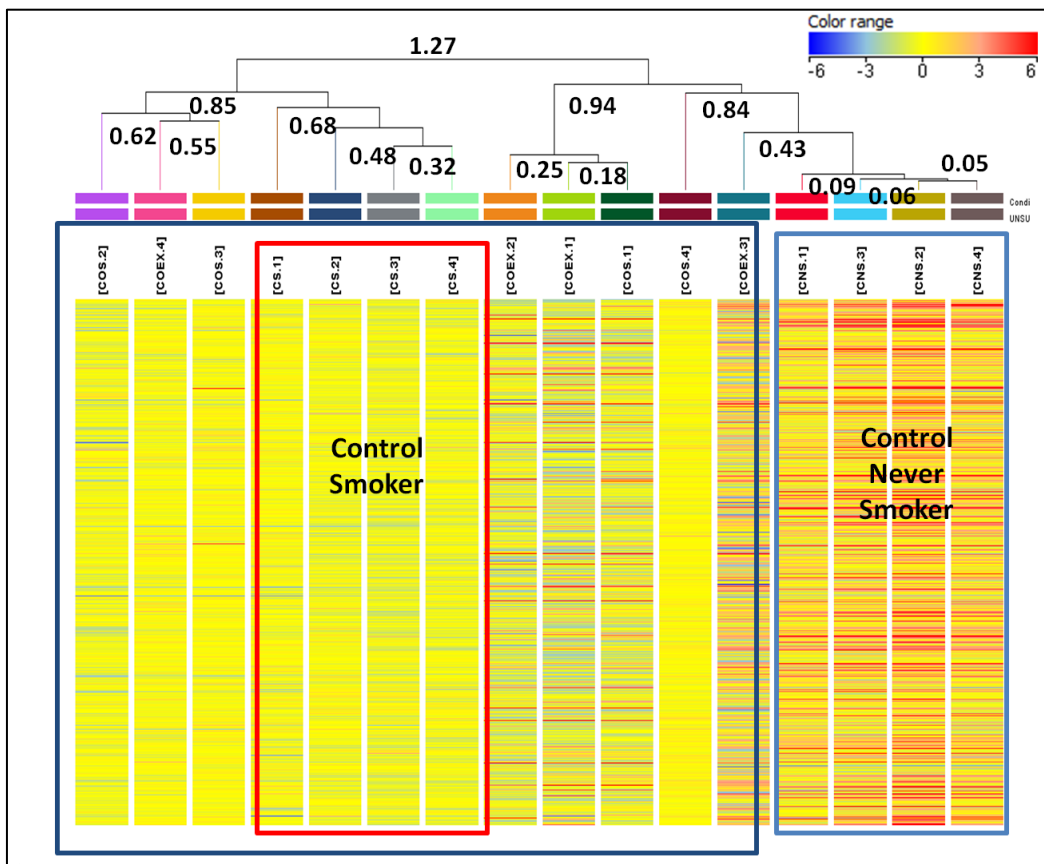

**Supplementary Figure 3:** Unsupervised Hierarchical Clustering analysis (uHCA) of COPD [COPD S (n = 4) and COPD Ex-S (n = 4)] and Control [CNS (n=4) and CS (n=4)] samples.

**Supplementary Table 1:** Differentially expressed genes in subgroups of Controls and COPD

- (i) Differentially expressed genes between Control smokers and COPD smoker having FC>3 and p value<0.05

| S.No | GeneSymbol | GeneName                                                            | FC    | p value |
|------|------------|---------------------------------------------------------------------|-------|---------|
| 1    | CLPS       | colipase, pancreatic                                                | -8.46 | 0.04    |
| 2    | ARMC6      | armadillo repeat containing 6                                       | -6.03 | 0.02    |
| 3    | ZNF646     | zinc finger protein 646                                             | -4.83 | 0.02    |
| 4    | FLJ38576   | uncharacterized LOC651430                                           | -4.79 | 0.02    |
| 5    | ITPKC      | inositol-trisphosphate 3-kinase C                                   | -4.35 | 0.04    |
| 6    | PLOD3      | procollagen-lysine, 2-oxoglutarate 5-dioxygenase 3                  | -3.49 | 0.02    |
| 7    | SLC4A8     | solute carrier family 4, sodium bicarbonate cotransporter, member 8 | -3.43 | 0.02    |
| 8    | TMEM30B    | transmembrane protein 30B                                           | -3.41 | 0.04    |

- (ii) Differentially expressed genes between Control smokers and COPD Ex-smoker having FC>3 and p value<0.05

| S.No | GeneSymbol | GeneName                                                            | FC      | p value |
|------|------------|---------------------------------------------------------------------|---------|---------|
| 1    | CLPS       | colipase, pancreatic                                                | -164.39 | 0.02    |
| 2    | ARMC6      | armadillo repeat containing 6                                       | -30.69  | 0.04    |
| 3    | FLJ38576   | uncharacterized LOC651430                                           | -29.07  | 0.04    |
| 4    | ZNF646     | zinc finger protein 646                                             | -28.55  | 0.02    |
| 5    | SLC4A8     | solute carrier family 4, sodium bicarbonate cotransporter, member 8 | -23.70  | 0.02    |
| 6    | TMEM30B    | transmembrane protein 30B                                           | -19.61  | 0.02    |
| 7    | CYP7A1     | cytochrome P450, family 7, subfamily A, polypeptide 1               | -16.44  | 0.04    |
| 8    | IGSF21     | immunoglobulin superfamily, member 21                               | -11.78  | 0.02    |

|    |              |                                                                     |        |      |
|----|--------------|---------------------------------------------------------------------|--------|------|
| 9  | ITPKC        | inositol-trisphosphate 3-kinase C                                   | -11.29 | 0.02 |
| 10 | LINC00476    | long intergenic non-protein coding RNA 476                          | -11.27 | 0.04 |
| 11 | GLTSCR1      | glioma tumor suppressor candidate region gene 1                     | -9.84  | 0.02 |
| 12 | TIRAP        | toll-interleukin 1 receptor (TIR) domain containing adaptor protein | -9.73  | 0.02 |
| 13 | PLOD3        | procollagen-lysine, 2-oxoglutarate 5-dioxygenase 3                  | -9.54  | 0.02 |
| 14 | HSPBP1       | HSPA (heat shock 70kDa) binding protein, cytoplasmic cochaperone 1  | -8.24  | 0.02 |
| 15 | CASC3        | cancer susceptibility candidate 3                                   | -7.60  | 0.04 |
| 16 | LOC100507277 | uncharacterized LOC100507277                                        | -7.41  | 0.04 |
| 17 | TBC1D25      | TBC1 domain family, member 25                                       | -6.36  | 0.02 |
| 18 | ZNF587       | zinc finger protein 587                                             | -6.15  | 0.02 |
| 19 | THSD7A       | thrombospondin, type I, domain containing 7A                        | -6.14  | 0.02 |
| 20 | GFM1         | G elongation factor, mitochondrial 1                                | -6.03  | 0.02 |
| 21 | FECH         | ferrochelatase                                                      | -5.17  | 0.02 |
| 22 | KIF22        | kinesin family member 22                                            | -4.70  | 0.02 |
| 23 | PWWP2B       | PWWP domain containing 2B                                           | -4.66  | 0.02 |
| 24 | FAM127B      | family with sequence similarity 127, member B                       | -4.52  | 0.04 |
| 25 | NCAPH2       | non-SMC condensin II complex, subunit H2                            | -4.34  | 0.02 |
| 26 | SHISA9       | shisa family member 9                                               | -4.34  | 0.02 |
| 27 | NOC2L        | nucleolar complex associated 2 homolog ( <i>S. cerevisiae</i> )     | -4.25  | 0.02 |
| 28 | TRIM60       | tripartite motif containing 60                                      | -4.08  | 0.02 |
| 29 | BCAR3        | breast cancer anti-estrogen resistance 3                            | -4.05  | 0.02 |
| 30 | NDUFB7       | NADH dehydrogenase (ubiquinone) 1 beta subcomplex, 7, 18kDa         | -4.02  | 0.02 |
| 31 | RABL3        | RAB, member of RAS oncogene family-like 3                           | -4.02  | 0.02 |
| 32 | ZNF813       | zinc finger protein 813                                             | -3.97  | 0.02 |
| 33 | PRPS1L1      | phosphoribosyl pyrophosphate synthetase 1-like 1                    | -3.94  | 0.04 |
| 34 | lnc-OTX2-3   | lnc-OTX2-3:1                                                        | -3.89  | 0.04 |

|    |                  |                                                               |       |      |
|----|------------------|---------------------------------------------------------------|-------|------|
| 35 | PAQR7            | progesterone and adiponectin receptor family member VII       | -3.63 | 0.02 |
| 36 | CELSR3           | cadherin, EGF LAG seven-pass G-type receptor 3                | -3.40 | 0.02 |
| 37 | PTPRZ1           | protein tyrosine phosphatase, receptor-type, Z polypeptide 1  | -3.35 | 0.02 |
| 38 | PCDH1            | protocadherin 1                                               | -3.32 | 0.02 |
| 39 | NKX3-1           | NK3 homeobox 1                                                | -3.29 | 0.02 |
| 40 | lnc-ESR2-1       | lnc-ESR2-1:1                                                  | -3.25 | 0.02 |
| 41 | ZNF510           | zinc finger protein 510                                       | -3.19 | 0.02 |
| 42 | TNFRSF19         | tumor necrosis factor receptor superfamily, member 19         | -3.18 | 0.02 |
| 43 | SLC13A1          | solute carrier family 13 (sodium/sulfate symporter), member 1 | -3.06 | 0.02 |
| 44 | lnc-AC040934.1-3 | lnc-AC040934.1-3:1                                            | -3.03 | 0.02 |
| 45 | CBLN1            | cerebellin 1 precursor                                        | -3.00 | 0.02 |

(iii) Differentially expressed genes between Control smokers and Control Never smokers having FC>3 and p value<0.05

| S.No | GeneSymbol | GeneName                                                                                       | FC      | p value |
|------|------------|------------------------------------------------------------------------------------------------|---------|---------|
| 1    | GFM1       | G elongation factor, mitochondrial 1                                                           | -165.59 | 0.02    |
| 2    | MLLT4      | myeloid/lymphoid or mixed-lineage leukemia (trithorax homolog, Drosophila); translocated to, 4 | -135.33 | 0.02    |
| 3    | MAGI2-AS3  | MAGI2 antisense RNA 3                                                                          | -122.62 | 0.02    |
| 4    | SLC6A14    | solute carrier family 6 (amino acid transporter), member 14                                    | -112.62 | 0.02    |
| 5    | PHLPP1     | PH domain and leucine rich repeat protein phosphatase 1                                        | -110.73 | 0.02    |
| 6    | ZNF229     | zinc finger protein 229                                                                        | -103.50 | 0.02    |
| 7    | TNFRSF19   | tumor necrosis factor receptor superfamily, member 19                                          | -100.77 | 0.02    |
| 8    | PLN        | phospholamban                                                                                  | -100.48 | 0.02    |
| 9    | PCDHB10    | protocadherin beta 10                                                                          | -100.29 | 0.02    |
| 10   | VLDLR      | very low density lipoprotein receptor                                                          | -95.62  | 0.02    |
| 11   | lnc-ESR2-1 | lnc-ESR2-1:1                                                                                   | -93.16  | 0.02    |

|    |              |                                                                   |        |      |
|----|--------------|-------------------------------------------------------------------|--------|------|
| 12 | CERS3        | ceramide synthase 3                                               | -92.15 | 0.02 |
| 13 | TUBB2B       | tubulin, beta 2B class IIb                                        | -91.55 | 0.02 |
| 14 | TEKT1        | tektin 1                                                          | -90.27 | 0.02 |
| 15 | THSD7A       | thrombospondin, type I, domain containing 7A                      | -90.15 | 0.02 |
| 16 | RHAG         | Rh-associated glycoprotein                                        | -87.53 | 0.02 |
| 17 | AVPR1A       | arginine vasopressin receptor 1A                                  | -85.79 | 0.02 |
| 18 | C1QL3        | complement component 1, q subcomponent-like 3                     | -84.04 | 0.02 |
| 19 | LCE1B        | late cornified envelope 1B                                        | -81.95 | 0.02 |
| 20 | AASDH        | aminoadipate-semialdehyde dehydrogenase                           | -80.36 | 0.02 |
| 21 | LOC101929683 | uncharacterized LOC101929683                                      | -79.77 | 0.02 |
| 22 | NKAIN3       | Na <sup>+</sup> /K <sup>+</sup> transporting ATPase interacting 3 | -79.55 | 0.02 |
| 23 | IQCH         | IQ motif containing H                                             | -78.45 | 0.02 |
| 24 | lnc-DR1-1    | lnc-DR1-1:1                                                       | -78.24 | 0.02 |
| 25 | LOC286071    | uncharacterized LOC286071                                         | -77.44 | 0.02 |
| 26 | CCDC68       | coiled-coil domain containing 68                                  | -74.64 | 0.02 |
| 27 | MID1         | midline 1                                                         | -74.21 | 0.02 |
| 28 | ADARB1       | adenosine deaminase, RNA-specific, B1                             | -72.98 | 0.02 |
| 29 | SPO11        | SPO11 meiotic protein covalently bound to DSB                     | -72.81 | 0.02 |
| 30 | CARD14       | caspase recruitment domain family, member 14                      | -71.63 | 0.02 |
| 31 | lnc-AKR1C3-1 | lnc-AKR1C3-1:1                                                    | -68.97 | 0.02 |
| 32 | LOC642620    | uncharacterized LOC642620                                         | -68.96 | 0.02 |
| 33 | KLHL29       | kelch-like family member 29                                       | -67.58 | 0.02 |
| 34 | SLC26A7      | solute carrier family 26 (anion exchanger), member 7              | -67.34 | 0.02 |
| 35 | STEAP1       | six transmembrane epithelial antigen of the prostate 1            | -67.24 | 0.02 |
| 36 | C2orf80      | chromosome 2 open reading frame 80                                | -66.59 | 0.02 |
| 37 | SLITRK5      | SLIT and NTRK-like family, member 5                               | -65.20 | 0.02 |
| 38 | TRIM60       | tripartite motif containing 60                                    | -64.82 | 0.02 |
| 39 | FAM13A       | family with sequence similarity 13, member A                      | -64.63 | 0.02 |
| 40 | AQP11        | aquaporin 11                                                      | -63.76 | 0.02 |
| 41 | SALL1        | spalt-like transcription factor 1                                 | -63.74 | 0.02 |
| 42 | COLCA2       | colorectal cancer associated 2                                    | -63.53 | 0.02 |

|    |              |                                                                                                                                             |        |      |
|----|--------------|---------------------------------------------------------------------------------------------------------------------------------------------|--------|------|
| 43 | LINC01192    | long intergenic non-protein coding RNA 1192                                                                                                 | -62.57 | 0.02 |
| 44 | RSPO2        | R-spondin 2                                                                                                                                 | -62.34 | 0.02 |
| 45 | LOC101929475 | uncharacterized LOC101929475                                                                                                                | -62.23 | 0.02 |
| 46 | WFDC10A      | WAP four-disulfide core domain 10A                                                                                                          | -60.83 | 0.02 |
| 47 | CDH6         | cadherin 6, type 2, K-cadherin (fetal kidney)                                                                                               | -60.80 | 0.02 |
| 48 | SLC13A1      | solute carrier family 13 (sodium/sulfate symporter), member 1                                                                               | -60.28 | 0.02 |
| 49 | GBP7         | guanylate binding protein 7                                                                                                                 | -60.01 | 0.02 |
| 50 | AGXT         | alanine-glyoxylate aminotransferase                                                                                                         | -59.47 | 0.02 |
| 51 | LYPD1        | LY6/PLAUR domain containing 1                                                                                                               | -59.05 | 0.02 |
| 52 | LINC00403    | long intergenic non-protein coding RNA 403                                                                                                  | -58.39 | 0.02 |
| 53 | RGS17        | regulator of G-protein signaling 17                                                                                                         | -58.25 | 0.02 |
| 54 | CRISP3       | cysteine-rich secretory protein 3                                                                                                           | -57.74 | 0.02 |
| 55 | LOC100507277 | uncharacterized LOC100507277                                                                                                                | -57.36 | 0.02 |
| 56 | SEMA5A       | sema domain, seven thrombospondin repeats (type 1 and type 1-like), transmembrane domain (TM) and short cytoplasmic domain, (semaphorin) 5A | -57.18 | 0.02 |
| 57 | LINC00656    | long intergenic non-protein coding RNA 656                                                                                                  | -56.52 | 0.02 |
| 58 | DLGAP1       | discs, large (Drosophila) homolog-associated protein 1                                                                                      | -56.37 | 0.02 |
| 59 | MAGEB3       | melanoma antigen family B, 3                                                                                                                | -56.10 | 0.02 |
| 60 | FAM149B1     | family with sequence similarity 149, member B1                                                                                              | -55.40 | 0.02 |
| 61 | ATP13A4      | ATPase type 13A4                                                                                                                            | -55.18 | 0.02 |
| 62 | PCDHGA5      | protocadherin gamma subfamily A, 5                                                                                                          | -55.13 | 0.02 |
| 63 | SPDYA        | speedy/RINGO cell cycle regulator family member A                                                                                           | -55.12 | 0.02 |
| 64 | AMOT         | angiominin                                                                                                                                  | -53.57 | 0.02 |
| 65 | C17orf104    | chromosome 17 open reading frame 104                                                                                                        | -53.56 | 0.02 |
| 66 | PNPO         | pyridoxamine 5'-phosphate oxidase                                                                                                           | -53.43 | 0.02 |
| 67 | HMMR-AS1     | HMMR antisense RNA 1                                                                                                                        | -53.10 | 0.02 |



|    |              |                                                                  |        |      |
|----|--------------|------------------------------------------------------------------|--------|------|
| 68 | CAPN11       | calpain 11                                                       | -52.93 | 0.02 |
| 69 | TP53BP1      | tumor protein p53 binding protein 1                              | -52.91 | 0.02 |
| 70 | lnc-PDE4D-1  | lnc-PDE4D-1:1                                                    | -52.91 | 0.02 |
| 71 | BHMT2        | betaine--homocysteine S-methyltransferase 2                      | -52.82 | 0.02 |
| 72 | CBLN1        | cerebellin 1 precursor                                           | -52.63 | 0.02 |
| 73 | DPP10        | dipeptidyl-peptidase 10 (non-functional)                         | -52.47 | 0.02 |
| 74 | CYP4X1       | cytochrome P450, family 4, subfamily X, polypeptide 1            | -52.40 | 0.02 |
| 75 | ATF7         | activating transcription factor 7                                | -52.39 | 0.02 |
| 76 | ZFP28        | ZFP28 zinc finger protein                                        | -52.16 | 0.02 |
| 77 | SLC6A3       | solute carrier family 6 (neurotransmitter transporter), member 3 | -51.96 | 0.02 |
| 78 | SLC10A7      | solute carrier family 10, member 7                               | -51.58 | 0.02 |
| 79 | SFRP2        | secreted frizzled-related protein 2                              | -51.13 | 0.02 |
| 80 | GRIK2        | glutamate receptor, ionotropic, kainate 2                        | -50.03 | 0.02 |
| 81 | GABRG2       | gamma-aminobutyric acid (GABA) A receptor, gamma 2               | -49.77 | 0.02 |
| 82 | LRRIQ1       | leucine-rich repeats and IQ motif containing 1                   | -49.51 | 0.02 |
| 83 | FAM53B-AS1   | FAM53B antisense RNA 1                                           | -49.29 | 0.02 |
| 84 | LHX6         | LIM homeobox 6                                                   | -49.23 | 0.02 |
| 85 | KLHL1        | kelch-like family member 1                                       | -49.21 | 0.02 |
| 86 | LOC100131864 | uncharacterized LOC100131864                                     | -49.14 | 0.02 |
| 87 | DUSP21       | dual specificity phosphatase 21                                  | -49.09 | 0.02 |
| 88 | DYNC2H1      | dynein, cytoplasmic 2, heavy chain 1                             | -48.78 | 0.02 |
| 89 | SALL3        | spalt-like transcription factor 3                                | -48.78 | 0.02 |
| 90 | DKK3         | dickkopf WNT signaling pathway inhibitor 3                       | -48.76 | 0.02 |
| 91 | AFF2         | AF4/FMR2 family, member 2                                        | -48.74 | 0.02 |
| 92 | lnc-OTX2-3   | lnc-OTX2-3:1                                                     | -48.40 | 0.02 |
| 93 | DCC          | DCC netrin 1 receptor                                            | -48.38 | 0.02 |
| 94 | DIRAS3       | DIRAS family, GTP-binding RAS-like 3                             | -48.24 | 0.02 |
| 95 | LHX9         | LIM homeobox 9                                                   | -48.08 | 0.02 |
| 96 | ZIC2         | Zic family member 2                                              | -47.99 | 0.02 |
| 97 | TMEM257      | transmembrane protein 257                                        | -47.57 | 0.02 |

|     |               |                                                                                        |        |      |
|-----|---------------|----------------------------------------------------------------------------------------|--------|------|
| 98  | GRM1          | glutamate receptor, metabotropic 1                                                     | -47.45 | 0.02 |
| 99  | SEMA3E        | sema domain, immunoglobulin domain (Ig), short basic domain, secreted, (semaphorin) 3E | -47.27 | 0.02 |
| 100 | SCAMPER       | sphingolipid Ca <sup>2+</sup> release mediating protein of endoplasmic reticulum       | -47.14 | 0.02 |
| 101 | COL19A1       | collagen, type XIX, alpha 1                                                            | -47.09 | 0.02 |
| 102 | SPAG16        | sperm associated antigen 16                                                            | -47.01 | 0.02 |
| 103 | TIE1          | tyrosine kinase with immunoglobulin-like and EGF-like domains 1                        | -46.68 | 0.02 |
| 104 | PRKAA2        | protein kinase, AMP-activated, alpha 2 catalytic subunit                               | -46.65 | 0.02 |
| 105 | ANGPT1        | angiopoietin 1                                                                         | -46.53 | 0.02 |
| 106 | IFNA8         | interferon, alpha 8                                                                    | -46.41 | 0.02 |
| 107 | LOC101928036  | uncharacterized LOC101928036                                                           | -46.41 | 0.02 |
| 108 | GJD4          | gap junction protein, delta 4, 40.1kDa                                                 | -46.38 | 0.02 |
| 109 | BRIP1         | BRCA1 interacting protein C-terminal helicase 1                                        | -46.33 | 0.02 |
| 110 | MMP20         | matrix metalloproteinase 20                                                            | -46.20 | 0.02 |
| 111 | GLP1R         | glucagon-like peptide 1 receptor                                                       | -46.06 | 0.02 |
| 112 | MBTPS2        | membrane-bound transcription factor peptidase, site 2                                  | -45.70 | 0.02 |
| 113 | CNTFR         | ciliary neurotrophic factor receptor                                                   | -45.57 | 0.02 |
| 114 | LRRC55        | leucine rich repeat containing 55                                                      | -45.50 | 0.02 |
| 115 | lnc-C3orf65-1 | lnc-C3orf65-1:1                                                                        | -45.46 | 0.02 |
| 116 | PCDHGB6       | protocadherin gamma subfamily B, 6                                                     | -45.39 | 0.02 |
| 117 | COL6A3        | collagen, type VI, alpha 3                                                             | -45.29 | 0.02 |
| 118 | PTPRZ1        | protein tyrosine phosphatase, receptor-type, Z polypeptide 1                           | -45.26 | 0.02 |
| 119 | FLRT2         | fibronectin leucine rich transmembrane protein 2                                       | -45.03 | 0.02 |
| 120 | ANKRD62       | ankyrin repeat domain 62                                                               | -44.96 | 0.02 |
| 121 | LRP2BP        | LRP2 binding protein                                                                   | -44.94 | 0.02 |
| 122 | CADM2         | cell adhesion molecule 2                                                               | -44.85 | 0.02 |
| 123 | lnc-GFAP-1    | lnc-GFAP-1:1                                                                           | -44.77 | 0.02 |

|     |              |                                                                  |        |      |
|-----|--------------|------------------------------------------------------------------|--------|------|
| 124 | SLC5A7       | solute carrier family 5 (sodium/choline cotransporter), member 7 | -44.77 | 0.02 |
| 125 | LOC101928794 | uncharacterized LOC101928794                                     | -44.33 | 0.02 |
| 126 | UTS2B        | urotensin 2B                                                     | -44.24 | 0.02 |
| 127 | MARK4        | MAP/microtubule affinity-regulating kinase 4                     | -44.15 | 0.02 |
| 128 | KRT12        | keratin 12, type I                                               | -43.90 | 0.02 |
| 129 | LOC100996573 | uncharacterized LOC100996573                                     | -43.54 | 0.02 |
| 130 | NDC80        | NDC80 kinetochore complex component                              | -43.34 | 0.02 |
| 131 | DNAH14       | dynein, axonemal, heavy chain 14                                 | -42.99 | 0.02 |
| 132 | DPY19L2      | dpy-19-like 2 (C. elegans)                                       | -42.92 | 0.02 |
| 133 | lnc-SNURF-3  | lnc-SNURF-3:21                                                   | -42.84 | 0.02 |
| 134 | SFXN1        | sideroflexin 1                                                   | -42.81 | 0.02 |
| 135 | SYNE1        | spectrin repeat containing, nuclear envelope 1                   | -42.44 | 0.02 |
| 136 | CCDC113      | coiled-coil domain containing 113                                | -42.14 | 0.02 |
| 137 | MIR1245A     | microRNA 1245a                                                   | -42.07 | 0.02 |
| 138 | ZNF682       | zinc finger protein 682                                          | -41.98 | 0.02 |
| 139 | PCDHB2       | protocadherin beta 2                                             | -41.94 | 0.02 |
| 140 | SPERT        | spermatid associated                                             | -41.70 | 0.02 |
| 141 | MYH7B        | myosin, heavy chain 7B, cardiac muscle, beta                     | -41.56 | 0.02 |
| 142 | ZNF471       | zinc finger protein 471                                          | -41.32 | 0.02 |
| 143 | NCAM2        | neural cell adhesion molecule 2                                  | -40.65 | 0.02 |
| 144 | LINC00615    | long intergenic non-protein coding RNA 615                       | -39.82 | 0.02 |
| 145 | MLPH         | melanophilin                                                     | -38.78 | 0.02 |
| 146 | APBB2        | amyloid beta (A4) precursor protein-binding, family B, member 2  | -38.14 | 0.02 |
| 147 | WDR72        | WD repeat domain 72                                              | -37.86 | 0.02 |
| 148 | IL22RA1      | interleukin 22 receptor, alpha 1                                 | -37.70 | 0.02 |
| 149 | NOX4         | NADPH oxidase 4                                                  | -37.38 | 0.02 |
| 150 | TRAF3IP2     | TRAF3 interacting protein 2                                      | -37.18 | 0.02 |
| 151 | VSTM2L       | V-set and transmembrane domain containing 2 like                 | -36.76 | 0.02 |
| 152 | DMD          | dystrophin                                                       | -36.19 | 0.02 |
| 153 | ADAMTSL1     | ADAMTS-like 1                                                    | -35.67 | 0.02 |
| 154 | SRGAP3       | SLIT-ROBO Rho GTPase activating protein 3                        | -34.41 | 0.02 |

|     |                |                                                                     |        |      |
|-----|----------------|---------------------------------------------------------------------|--------|------|
| 155 | PHC3           | polyhomeotic homolog 3 (Drosophila)                                 | -34.36 | 0.02 |
| 156 | INSM1          | insulinoma-associated 1                                             | -34.16 | 0.02 |
| 157 | lnc-FAM189A1-3 | lnc-FAM189A1-3:1                                                    | -33.64 | 0.02 |
| 158 | RGS4           | regulator of G-protein signaling 4                                  | -33.63 | 0.02 |
| 159 | FAM47E         | family with sequence similarity 47, member E                        | -33.57 | 0.02 |
| 160 | FBLIM1         | filamin binding LIM protein 1                                       | -33.57 | 0.02 |
| 161 | CCDC144A       | coiled-coil domain containing 144A                                  | -33.55 | 0.02 |
| 162 | PVRL3          | poliovirus receptor-related 3                                       | -33.10 | 0.02 |
| 163 | XKR6           | XK, Kell blood group complex subunit-related family, member 6       | -33.06 | 0.02 |
| 164 | SLC30A8        | solute carrier family 30 (zinc transporter), member 8               | -31.30 | 0.02 |
| 165 | CCM2L          | cerebral cavernous malformation 2-like                              | -30.97 | 0.02 |
| 166 | NR0B1          | nuclear receptor subfamily 0, group B, member 1                     | -29.98 | 0.02 |
| 167 | C15orf56       | chromosome 15 open reading frame 56                                 | -29.54 | 0.02 |
| 168 | RBMY1E         | RNA binding motif protein, Y-linked, family 1, member E             | -28.66 | 0.02 |
| 169 | ECM2           | extracellular matrix protein 2, female organ and adipocyte specific | -27.58 | 0.02 |
| 170 | BMP7           | bone morphogenetic protein 7                                        | -27.52 | 0.02 |
| 171 | DCAF12L1       | DDB1 and CUL4 associated factor 12-like 1                           | -25.86 | 0.02 |
| 172 | PDP2           | pyruvate dehydrogenase phosphatase catalytic subunit 2              | -25.29 | 0.02 |
| 173 | LUM            | lumican                                                             | -23.03 | 0.02 |
| 174 | WDR62          | WD repeat domain 62                                                 | -21.92 | 0.02 |
| 175 | CTGF           | connective tissue growth factor                                     | -21.67 | 0.02 |
| 176 | C8orf34        | chromosome 8 open reading frame 34                                  | -21.06 | 0.02 |
| 177 | FHAD1          | forkhead-associated (FHA) phosphopeptide binding domain 1           | -20.18 | 0.02 |
| 178 | C5orf66-AS2    | C5orf66 antisense RNA 2                                             | -19.34 | 0.02 |
| 179 | OTC            | ornithine carbamoyltransferase                                      | -18.12 | 0.02 |
| 180 | lnc-FZD4-1     | lnc-FZD4-1:2                                                        | -18.04 | 0.02 |

|     |              |                                                                          |        |      |
|-----|--------------|--------------------------------------------------------------------------|--------|------|
| 181 | ACSS3        | acyl-CoA synthetase short-chain family member 3                          | -17.93 | 0.02 |
| 182 | UACA         | uveal autoantigen with coiled-coil domains and ankyrin repeats           | -17.85 | 0.02 |
| 183 | CDH26        | cadherin 26                                                              | -17.62 | 0.02 |
| 184 | FOXP2        | forkhead box P2                                                          | -17.33 | 0.02 |
| 185 | ATP1B4       | ATPase, Na <sup>+</sup> /K <sup>+</sup> transporting, beta 4 polypeptide | -17.32 | 0.02 |
| 186 | ETV3L        | ets variant 3-like                                                       | -17.00 | 0.02 |
| 187 | LIPH         | lipase, member H                                                         | -16.92 | 0.02 |
| 188 | TXNL1        | thioredoxin-like 1                                                       | -16.21 | 0.02 |
| 189 | CASC5        | cancer susceptibility candidate 5                                        | -15.88 | 0.02 |
| 190 | THOC5        | THO complex 5                                                            | -15.81 | 0.02 |
| 191 | CCP110       | centriolar coiled coil protein 110kDa                                    | -15.24 | 0.02 |
| 192 | ACACA        | acetyl-CoA carboxylase alpha                                             | -14.78 | 0.02 |
| 193 | PGAP1        | post-GPI attachment to proteins 1                                        | -14.70 | 0.02 |
| 194 | BRCA2        | breast cancer 2, early onset                                             | -14.34 | 0.02 |
| 195 | TTY12        | testis-specific transcript, Y-linked 12 (non-protein coding)             | -14.25 | 0.02 |
| 196 | GLDN         | gliomedin                                                                | -14.23 | 0.02 |
| 197 | BRIP1        | BRCA1 interacting protein C-terminal helicase 1                          | -14.20 | 0.02 |
| 198 | HOGA1        | 4-hydroxy-2-oxoglutarate aldolase 1                                      | -14.16 | 0.02 |
| 199 | PRDM9        | PR domain containing 9                                                   | -14.01 | 0.02 |
| 200 | NMNAT2       | nicotinamide nucleotide adenylyltransferase 2                            | -13.85 | 0.02 |
| 201 | MARVELD3     | MARVEL domain containing 3                                               | -13.80 | 0.02 |
| 202 | SLC25A26     | solute carrier family 25 (S-adenosylmethionine carrier), member 26       | -13.73 | 0.02 |
| 203 | lnc-ANTXRL-2 | lnc-ANTXRL-2:1                                                           | -13.51 | 0.02 |
| 204 | GARNL3       | GTPase activating Rap/RanGAP domain-like 3                               | -13.11 | 0.02 |
| 205 | FRMD3        | FERM domain containing 3                                                 | -13.04 | 0.02 |
| 206 | ZFYVE16      | zinc finger, FYVE domain containing 16                                   | -13.00 | 0.02 |
| 207 | PUS10        | pseudouridylate synthase 10                                              | -12.04 | 0.02 |
| 208 | INTS1        | integrator complex subunit 1                                             | -12.00 | 0.02 |
| 209 | SPINK6       | serine peptidase inhibitor, Kazal type 6                                 | -11.91 | 0.02 |

|     |              |                                                                                   |        |      |
|-----|--------------|-----------------------------------------------------------------------------------|--------|------|
| 210 | PRAMENP      | PRAME N-terminal-like, pseudogene                                                 | -11.07 | 0.02 |
| 211 | ULBP2        | UL16 binding protein 2                                                            | -10.93 | 0.02 |
| 212 | TRAF3IP2-AS1 | TRAF3IP2 antisense RNA 1                                                          | -10.91 | 0.02 |
| 213 | FAM27E2      | family with sequence similarity 27, member E2                                     | -10.70 | 0.02 |
| 214 | PIANP        | PILR alpha associated neural protein                                              | -10.65 | 0.02 |
| 215 | SLC25A5-AS1  | SLC25A5 antisense RNA 1                                                           | -10.52 | 0.02 |
| 216 | HBM          | hemoglobin, mu                                                                    | -10.52 | 0.02 |
| 217 | TRIM17       | tripartite motif containing 17                                                    | -10.30 | 0.02 |
| 218 | KIT          | v-kit Hardy-Zuckerman 4 feline sarcoma viral oncogene homolog                     | -10.30 | 0.02 |
| 219 | TRIM48       | tripartite motif containing 48                                                    | -10.28 | 0.02 |
| 220 | CASC10       | cancer susceptibility candidate 10                                                | -10.27 | 0.02 |
| 221 | C1orf167     | chromosome 1 open reading frame 167                                               | -10.26 | 0.02 |
| 222 | FMNL3        | formin-like 3                                                                     | -10.24 | 0.02 |
| 223 | CALCR        | calcitonin receptor                                                               | -10.24 | 0.02 |
| 224 | IFT57        | intraflagellar transport 57                                                       | -10.23 | 0.02 |
| 225 | ENAH         | enabled homolog (Drosophila)                                                      | -10.21 | 0.02 |
| 226 | RSPH9        | radial spoke head 9 homolog (Chlamydomonas)                                       | -10.06 | 0.02 |
| 227 | WDHD1        | WD repeat and HMG-box DNA binding protein 1                                       | -9.79  | 0.02 |
| 228 | ZNF587B      | zinc finger protein 587B                                                          | -9.76  | 0.02 |
| 229 | ZNF251       | zinc finger protein 251                                                           | -9.54  | 0.02 |
| 230 | LOC643406    | uncharacterized LOC643406                                                         | -9.40  | 0.02 |
| 231 | FITM2        | fat storage-inducing transmembrane protein 2                                      | -9.36  | 0.02 |
| 232 | ZFP2         | ZFP2 zinc finger protein                                                          | -9.30  | 0.02 |
| 233 | lnc-PCDH19-1 | lnc-PCDH19-1:1                                                                    | -9.30  | 0.02 |
| 234 | SCN9A        | sodium channel, voltage gated, type IX alpha subunit                              | -9.18  | 0.02 |
| 235 | TCTN1        | tectonic family member 1                                                          | -9.11  | 0.02 |
| 236 | CAPN13       | calpain 13                                                                        | -9.06  | 0.02 |
| 237 | COLEC11      | collectin sub-family member 11                                                    | -8.97  | 0.02 |
| 238 | SLC9B1       | solute carrier family 9, subfamily B (NHA1, cation proton antiporter 1), member 1 | -8.97  | 0.02 |
| 239 | CNNM2        | cyclin and CBS domain divalent metal cation transport mediator 2                  | -8.77  | 0.02 |

|     |              |                                                                       |       |      |
|-----|--------------|-----------------------------------------------------------------------|-------|------|
| 240 | LRR63        | leucine rich repeat containing 63                                     | -8.72 | 0.02 |
| 241 | LACRT        | lacritin                                                              | -8.65 | 0.02 |
| 242 | LOC101927482 | uncharacterized LOC101927482                                          | -8.59 | 0.02 |
| 243 | ZFP30        | ZFP30 zinc finger protein                                             | -8.53 | 0.02 |
| 244 | AVPR2        | arginine vasopressin receptor 2                                       | -8.48 | 0.02 |
| 245 | SLC35D1      | solute carrier family 35 (UDP-GlcA/UDP-GalNAc transporter), member D1 | -8.47 | 0.02 |
| 246 | KRT80        | keratin 80, type II                                                   | -8.46 | 0.02 |
| 247 | PLA2G10      | phospholipase A2, group X                                             | -8.40 | 0.02 |
| 248 | CD276        | CD276 molecule                                                        | -8.39 | 0.02 |
| 249 | RBBP5        | retinoblastoma binding protein 5                                      | -8.35 | 0.02 |
| 250 | HCG9         | HLA complex group 9 (non-protein coding)                              | -8.27 | 0.02 |
| 251 | ASH1L        | ash1 (absent, small, or homeotic)-like (Drosophila)                   | -8.27 | 0.02 |
| 252 | STRBP        | spermatid perinuclear RNA binding protein                             | -8.17 | 0.02 |
| 253 | TNFRSF21     | tumor necrosis factor receptor superfamily, member 21                 | -8.15 | 0.02 |
| 254 | ZSCAN2       | zinc finger and SCAN domain containing 2                              | -8.10 | 0.02 |
| 255 | ABCA10       | ATP-binding cassette, sub-family A (ABC1), member 10                  | -8.06 | 0.02 |
| 256 | SLC4A8       | solute carrier family 4, sodium bicarbonate cotransporter, member 8   | -7.92 | 0.02 |
| 257 | CALB2        | calbindin 2                                                           | -7.88 | 0.02 |
| 258 | RSPH4A       | radial spoke head 4 homolog A (Chlamydomonas)                         | -7.78 | 0.02 |
| 259 | TPD52        | tumor protein D52                                                     | -7.76 | 0.02 |
| 260 | MUC12        | mucin 12, cell surface associated                                     | -7.75 | 0.02 |
| 261 | ZNF383       | zinc finger protein 383                                               | -7.71 | 0.02 |
| 262 | RIC3         | RIC3 acetylcholine receptor chaperone                                 | -7.68 | 0.02 |
| 263 | GSTCD        | glutathione S-transferase, C-terminal domain containing               | -7.64 | 0.02 |
| 264 | TRAM1        | translocation associated membrane protein 1                           | -7.56 | 0.02 |
| 265 | TBC1D25      | TBC1 domain family, member 25                                         | -7.51 | 0.02 |

|     |              |                                                                       |       |      |
|-----|--------------|-----------------------------------------------------------------------|-------|------|
| 266 | ACSBG1       | acyl-CoA synthetase bubblegum family member 1                         | -7.49 | 0.02 |
| 267 | HNRNPM       | heterogeneous nuclear ribonucleoprotein M                             | -7.48 | 0.02 |
| 268 | MRAP         | melanocortin 2 receptor accessory protein                             | -7.48 | 0.02 |
| 269 | STAG3L4      | stromal antigen 3-like 4 (pseudogene)                                 | -7.46 | 0.02 |
| 270 | ASTN1        | astrotactin 1                                                         | -7.45 | 0.02 |
| 271 | PRSS1        | protease, serine, 1 (trypsin 1)                                       | -7.44 | 0.02 |
| 272 | GLUD1P7      | glutamate dehydrogenase 1 pseudogene 7                                | -7.44 | 0.02 |
| 273 | HDAC6        | histone deacetylase 6                                                 | -7.43 | 0.02 |
| 274 | ELL3         | elongation factor RNA polymerase II-like 3                            | -7.43 | 0.02 |
| 275 | CELF3        | CUGBP, Elav-like family member 3                                      | -7.42 | 0.02 |
| 276 | EOGT         | EGF domain-specific O-linked N-acetylglucosamine (GlcNAc) transferase | -7.40 | 0.02 |
| 277 | ANKRD34B     | ankyrin repeat domain 34B                                             | -7.39 | 0.02 |
| 278 | IL4          | interleukin 4                                                         | -7.37 | 0.02 |
| 279 | LMF1         | lipase maturation factor 1                                            | -7.36 | 0.02 |
| 280 | FLJ44715     | uncharacterized LOC386671                                             | -7.33 | 0.02 |
| 281 | C19orf80     | chromosome 19 open reading frame 80                                   | -7.25 | 0.02 |
| 282 | IER3IP1      | immediate early response 3 interacting protein 1                      | -7.23 | 0.02 |
| 283 | ZNF551       | zinc finger protein 551                                               | -7.21 | 0.02 |
| 284 | CCDC173      | coiled-coil domain containing 173                                     | -7.19 | 0.02 |
| 285 | SSX2         | synovial sarcoma, X breakpoint 2                                      | -7.09 | 0.02 |
| 286 | FBXO10       | F-box protein 10                                                      | -7.07 | 0.02 |
| 287 | SUN3         | Sad1 and UNC84 domain containing 3                                    | -7.04 | 0.02 |
| 288 | P2RY12       | purinergic receptor P2Y, G-protein coupled, 12                        | -7.04 | 0.02 |
| 289 | ZNF366       | zinc finger protein 366                                               | -7.00 | 0.02 |
| 290 | lnc-WDR34-2  | lnc-WDR34-2:2                                                         | -6.98 | 0.02 |
| 291 | WNK2         | WNK lysine deficient protein kinase 2                                 | -6.98 | 0.02 |
| 292 | DPYS         | dihydropyrimidinase                                                   | -6.91 | 0.02 |
| 293 | lnc-PLA2G3-1 | lnc-PLA2G3-1:1                                                        | -6.88 | 0.02 |
| 294 | GPR27        | G protein-coupled receptor 27                                         | -6.80 | 0.02 |
| 295 | ARHGEF10     | Rho guanine nucleotide exchange factor (GEF) 10                       | -6.79 | 0.02 |



|     |           |                                                                 |       |      |
|-----|-----------|-----------------------------------------------------------------|-------|------|
| 296 | RNF157    | ring finger protein 157                                         | -6.65 | 0.02 |
| 297 | FAM106CP  | family with sequence similarity 106, member C, pseudogene       | -6.45 | 0.02 |
| 298 | C6orf52   | chromosome 6 open reading frame 52                              | -6.42 | 0.02 |
| 299 | FSIP1     | fibrous sheath interacting protein 1                            | -6.42 | 0.02 |
| 300 | STON2     | stonin 2                                                        | -6.40 | 0.02 |
| 301 | IGSF21    | immunoglobulin superfamily, member 21                           | -6.39 | 0.02 |
| 302 | SEC14L1   | SEC14-like 1 ( <i>S. cerevisiae</i> )                           | -6.37 | 0.02 |
| 303 | C11orf97  | chromosome 11 open reading frame 97                             | -6.36 | 0.02 |
| 304 | NF2       | neurofibromin 2 (merlin)                                        | -6.32 | 0.04 |
| 305 | PRAMEF19  | PRAME family member 19                                          | -6.30 | 0.02 |
| 306 | HAS3      | hyaluronan synthase 3                                           | -6.25 | 0.02 |
| 307 | CUX1      | cut-like homeobox 1                                             | -6.25 | 0.02 |
| 308 | OSBP2     | oxysterol binding protein 2                                     | -6.24 | 0.02 |
| 309 | DLGAP5    | discs, large ( <i>Drosophila</i> ) homolog-associated protein 5 | -6.19 | 0.02 |
| 310 | RSG1      | REM2 and RAB-like small GTPase 1                                | -6.11 | 0.02 |
| 311 | TXLNA     | taxilin alpha                                                   | -6.10 | 0.02 |
| 312 | POTEI     | POTE ankyrin domain family, member I                            | -6.05 | 0.02 |
| 313 | PPEF1     | protein phosphatase, EF-hand calcium binding domain 1           | -6.03 | 0.02 |
| 314 | SLC35G1   | solute carrier family 35, member G1                             | -6.02 | 0.02 |
| 315 | C9orf131  | chromosome 9 open reading frame 131                             | -5.99 | 0.02 |
| 316 | DTX4      | deltex 4, E3 ubiquitin ligase                                   | -5.99 | 0.02 |
| 317 | LPPR4     | lipid phosphate phosphatase-related protein type 4              | -5.96 | 0.02 |
| 318 | RPS2      | ribosomal protein S2                                            | -5.95 | 0.02 |
| 319 | ALKBH5    | AlkB family member 5, RNA demethylase                           | -5.95 | 0.02 |
| 320 | ZCCHC18   | zinc finger, CCHC domain containing 18                          | -5.86 | 0.02 |
| 321 | LANCL2    | LanClantibioticsynthetase component C-like 2 (bacterial)        | -5.84 | 0.02 |
| 322 | KIRREL2   | kin of IRRE like 2 ( <i>Drosophila</i> )                        | -5.83 | 0.02 |
| 323 | ZNF221    | zinc finger protein 221                                         | -5.83 | 0.02 |
| 324 | lnc-FAS-1 | lnc-FAS-1:1                                                     | -5.80 | 0.02 |
| 325 | NEK9      | NIMA-related kinase 9                                           | -5.80 | 0.02 |
| 326 | FLCN      | folliculin                                                      | -5.78 | 0.02 |

|     |              |                                                                 |       |      |
|-----|--------------|-----------------------------------------------------------------|-------|------|
| 327 | OLFML2A      | olfactomedin-like 2A                                            | -5.78 | 0.02 |
| 328 | ARHGAP5-AS1  | ARHGAP5 antisense RNA 1 (head to head)                          | -5.77 | 0.02 |
| 329 | ZNF16        | zinc finger protein 16                                          | -5.73 | 0.02 |
| 330 | CD79B        | CD79b molecule, immunoglobulin-associated beta                  | -5.72 | 0.02 |
| 331 | KCNJ9        | potassium channel, inwardly rectifying subfamily J, member 9    | -5.71 | 0.02 |
| 332 | GPR135       | G protein-coupled receptor 135                                  | -5.70 | 0.02 |
| 333 | CDC25B       | cell division cycle 25B                                         | -5.70 | 0.02 |
| 334 | ZNF530       | zinc finger protein 530                                         | -5.67 | 0.02 |
| 335 | LINC00839    | long intergenic non-protein coding RNA 839                      | -5.67 | 0.02 |
| 336 | CLGN         | calmegin                                                        | -5.64 | 0.02 |
| 337 | SFTPA2       | surfactant protein A2                                           | -5.63 | 0.02 |
| 338 | TM7SF2       | transmembrane 7 superfamily member 2                            | -5.60 | 0.02 |
| 339 | KLKB1        | kallikrein B, plasma (Fletcher factor) 1                        | -5.58 | 0.02 |
| 340 | LOC200726    | hCG1657980                                                      | -5.53 | 0.02 |
| 341 | L3MBTL1      | l(3)mbt-like 1 (Drosophila)                                     | -5.52 | 0.02 |
| 342 | BEND7        | BEN domain containing 7                                         | -5.52 | 0.02 |
| 343 | ZNF501       | zinc finger protein 501                                         | -5.50 | 0.02 |
| 344 | OTUD7B       | OTU deubiquitinase 7B                                           | -5.48 | 0.02 |
| 345 | OLAH         | oleoyl-ACP hydrolase                                            | -5.47 | 0.02 |
| 346 | LOC101928092 | uncharacterized LOC101928092                                    | -5.41 | 0.02 |
| 347 | PPP2R3A      | protein phosphatase 2, regulatory subunit B'', alpha            | -5.40 | 0.02 |
| 348 | ERMN         | ermin, ERM-like protein                                         | -5.39 | 0.02 |
| 349 | MYNN         | myoneurin                                                       | -5.39 | 0.02 |
| 350 | VPS13B       | vacuolar protein sorting 13 homolog B (yeast)                   | -5.37 | 0.02 |
| 351 | HAGLROS      | HAGLR opposite strand (non-protein coding)                      | -5.33 | 0.02 |
| 352 | GPALPP1      | GPALPP motifs containing 1                                      | -5.32 | 0.02 |
| 353 | PIP5K1P1     | phosphatidylinositol-4-phosphate 5-kinase, type I, pseudogene 1 | -5.29 | 0.02 |
| 354 | FGF14-AS2    | FGF14 antisense RNA 2                                           | -5.28 | 0.02 |
| 355 | ZNF146       | zinc finger protein 146                                         | -5.26 | 0.02 |
| 356 | NAA40        | N(alpha)-acetyltransferase 40, NatD catalytic subunit           | -5.24 | 0.02 |
| 357 | ZNF718       | zinc finger protein 718                                         | -5.23 | 0.02 |

|     |              |                                                                                                     |       |      |
|-----|--------------|-----------------------------------------------------------------------------------------------------|-------|------|
| 358 | BBS7         | Bardet-Biedl syndrome 7                                                                             | -5.21 | 0.02 |
| 359 | IKZF2        | IKAROS family zinc finger 2 (Helios)                                                                | -5.21 | 0.02 |
| 360 | SMURF2       | SMAD specific E3 ubiquitin protein ligase 2                                                         | -5.20 | 0.02 |
| 361 | CDK17        | cyclin-dependent kinase 17                                                                          | -5.20 | 0.02 |
| 362 | ZFP3         | ZFP3 zinc finger protein                                                                            | -5.19 | 0.02 |
| 363 | ND1          | NADH dehydrogenase, subunit 1 (complex I)                                                           | -5.18 | 0.02 |
| 364 | MSANTD3      | Myb/SANT-like DNA-binding domain containing 3                                                       | -5.17 | 0.02 |
| 365 | CCL26        | chemokine (C-C motif) ligand 26                                                                     | -5.16 | 0.02 |
| 366 | RABL2A       | RAB, member of RAS oncogene family-like 2A                                                          | -5.14 | 0.02 |
| 367 | ZNF682       | zinc finger protein 682                                                                             | -5.11 | 0.02 |
| 368 | MAPRE2       | microtubule-associated protein, RP/EB family, member 2                                              | -5.11 | 0.04 |
| 369 | C1orf115     | chromosome 1 open reading frame 115                                                                 | -5.08 | 0.02 |
| 370 | ABCA11P      | ATP-binding cassette, subfamily A (ABC1), member 11, pseudogene                                     | -5.05 | 0.02 |
| 371 | UEVLD        | UEV and lactate/malate dehydrogenase domains                                                        | -5.03 | 0.02 |
| 372 | ANXA11       | annexin A11                                                                                         | -5.00 | 0.02 |
| 373 | TRPV4        | transient receptor potential cation channel, subfamily V, member 4                                  | -5.00 | 0.02 |
| 374 | PDE12        | phosphodiesterase 12                                                                                | -4.99 | 0.02 |
| 375 | lnc-XRCC6-1  | lnc-XRCC6-1:1                                                                                       | -4.99 | 0.02 |
| 376 | ZNF75A       | zinc finger protein 75a                                                                             | -4.94 | 0.02 |
| 377 | ADAL         | adenosine deaminase-like                                                                            | -4.93 | 0.02 |
| 378 | PRG2         | proteoglycan 2, bone marrow (natural killer cell activator, eosinophil granule major basic protein) | -4.93 | 0.02 |
| 379 | MFI2-AS1     | MFI2 antisense RNA 1                                                                                | -4.92 | 0.02 |
| 380 | CLCN2        | chloride channel, voltage-sensitive 2                                                               | -4.91 | 0.02 |
| 381 | ZNF561       | zinc finger protein 561                                                                             | -4.91 | 0.02 |
| 382 | KIAA1804     | mixed lineage kinase 4                                                                              | -4.88 | 0.02 |
| 383 | OPTC         | opticin                                                                                             | -4.84 | 0.02 |
| 384 | BRWD1-IT2    | BRWD1 intronic transcript 2 (non-protein coding)                                                    | -4.84 | 0.02 |
| 385 | lnc-GPR183-2 | lnc-GPR183-2:4                                                                                      | -4.84 | 0.02 |
| 386 | MCOLN2       | mucolipin 2                                                                                         | -4.80 | 0.02 |

|     |             |                                                                     |       |      |
|-----|-------------|---------------------------------------------------------------------|-------|------|
| 387 | ATP6V1C2    | ATPase, H <sup>+</sup> transporting, lysosomal 42kDa, V1 subunit C2 | -4.79 | 0.02 |
| 388 | RAP2C-AS1   | RAP2C antisense RNA 1                                               | -4.77 | 0.02 |
| 389 | SETD8       | SET domain containing (lysine methyltransferase) 8                  | -4.77 | 0.02 |
| 390 | AHI1        | Abelson helper integration site 1                                   | -4.77 | 0.02 |
| 391 | ORAOV1      | oral cancer overexpressed 1                                         | -4.74 | 0.02 |
| 392 | TMEM144     | transmembrane protein 144                                           | -4.73 | 0.02 |
| 393 | NUP43       | nucleoporin 43kDa                                                   | -4.73 | 0.02 |
| 394 | HESX1       | HESX homeobox 1                                                     | -4.73 | 0.02 |
| 395 | DDX31       | DEAD (Asp-Glu-Ala-Asp) box polypeptide 31                           | -4.70 | 0.02 |
| 396 | ANKRD20A12P | ankyrin repeat domain 20 family, member A12, pseudogene             | -4.70 | 0.02 |
| 397 | LURAP1      | leucine rich adaptor protein 1                                      | -4.68 | 0.02 |
| 398 | ZNF443      | zinc finger protein 443                                             | -4.67 | 0.02 |
| 399 | ACTR3B      | ARP3 actin-related protein 3 homolog B (yeast)                      | -4.67 | 0.02 |
| 400 | CDHR1       | cadherin-related family member 1                                    | -4.67 | 0.02 |
| 401 | PHF8        | PHD finger protein 8                                                | -4.67 | 0.02 |
| 402 | ZNF664      | zinc finger protein 664                                             | -4.63 | 0.02 |
| 403 | ZMAT3       | zinc finger, matrin-type 3                                          | -4.62 | 0.02 |
| 404 | MCM4        | minichromosome maintenance complex component 4                      | -4.62 | 0.02 |
| 405 | DNAH9       | dynein, axonemal, heavy chain 9                                     | -4.61 | 0.02 |
| 406 | ZBTB41      | zinc finger and BTB domain containing 41                            | -4.61 | 0.02 |
| 407 | PDE12       | phosphodiesterase 12                                                | -4.60 | 0.02 |
| 408 | NAV2        | neuron navigator 2                                                  | -4.60 | 0.02 |
| 409 | VHLL        | von Hippel-Lindau tumor suppressor-like                             | -4.57 | 0.02 |
| 410 | C17orf100   | chromosome 17 open reading frame 100                                | -4.57 | 0.02 |
| 411 | FLJ38576    | uncharacterized LOC651430                                           | -4.56 | 0.02 |
| 412 | ZC3H12D     | zinc finger CCCH-type containing 12D                                | -4.55 | 0.02 |
| 413 | SPG11       | spastic paraplegia 11 (autosomal recessive)                         | -4.53 | 0.02 |
| 414 | RNF38       | ring finger protein 38                                              | -4.53 | 0.02 |
| 415 | TNRC6C      | trinucleotide repeat containing 6C                                  | -4.52 | 0.02 |
| 416 | RPS3        | ribosomal protein S3                                                | -4.52 | 0.02 |

|     |                      |                                                         |              |             |
|-----|----------------------|---------------------------------------------------------|--------------|-------------|
| 417 | <b>TMEM171</b>       | <b>transmembrane protein 171</b>                        | <b>-4.50</b> | <b>0.02</b> |
| 418 | <b>LRRC42</b>        | <b>leucine rich repeat containing 42</b>                | <b>-4.49</b> | <b>0.02</b> |
| 419 | <b>lnc-TMEM109-1</b> | <b>lnc-TMEM109-1:1</b>                                  | <b>-4.47</b> | <b>0.02</b> |
| 420 | <b>ERCC4</b>         | <b>excision repair cross-complementation group 4</b>    | <b>-4.47</b> | <b>0.02</b> |
| 421 | <b>HMG5</b>          | <b>high mobility group nucleosome binding domain 5</b>  | <b>-4.45</b> | <b>0.02</b> |
| 422 | <b>lnc-CHD1L-1</b>   | <b>lnc-CHD1L-1:3</b>                                    | <b>-4.44</b> | <b>0.02</b> |
| 423 | <b>TLE6</b>          | <b>transducin-like enhancer of split 6</b>              | <b>-4.41</b> | <b>0.02</b> |
| 424 | <b>ZNF69</b>         | <b>zinc finger protein 69</b>                           | <b>-4.39</b> | <b>0.02</b> |
| 425 | <b>MFAP3</b>         | <b>microfibrillar-associated protein 3</b>              | <b>-4.39</b> | <b>0.02</b> |
| 426 | <b>NTF3</b>          | <b>neurotrophin 3</b>                                   | <b>-4.36</b> | <b>0.02</b> |
| 427 | <b>SCAND2P</b>       | <b>SCAN domain containing 2 pseudogene</b>              | <b>-4.35</b> | <b>0.02</b> |
| 428 | <b>CD81</b>          | <b>CD81 molecule</b>                                    | <b>-4.35</b> | <b>0.02</b> |
| 429 | <b>MEIG1</b>         | <b>meiosis/spermiogenesis associated 1</b>              | <b>-4.34</b> | <b>0.02</b> |
| 430 | <b>SNRPC</b>         | <b>small nuclear ribonucleoprotein polypeptide C</b>    | <b>-4.34</b> | <b>0.02</b> |
| 431 | <b>GPATCH2L</b>      | <b>G patch domain containing 2-like</b>                 | <b>-4.33</b> | <b>0.02</b> |
| 432 | <b>MAGED4B</b>       | <b>melanoma antigen family D, 4B</b>                    | <b>-4.31</b> | <b>0.02</b> |
| 433 | <b>SESN3</b>         | <b>sestrin 3</b>                                        | <b>-4.30</b> | <b>0.02</b> |
| 434 | <b>RALGPS1</b>       | <b>Ral GEF with PH domain and SH3 binding motif 1</b>   | <b>-4.29</b> | <b>0.02</b> |
| 435 | <b>ZSCAN30</b>       | <b>zinc finger and SCAN domain containing 30</b>        | <b>-4.28</b> | <b>0.02</b> |
| 436 | <b>THRAP3</b>        | <b>thyroid hormone receptor associated protein 3</b>    | <b>-4.27</b> | <b>0.02</b> |
| 437 | <b>TCEAL7</b>        | <b>transcription elongation factor A (SII)-like 7</b>   | <b>-4.27</b> | <b>0.02</b> |
| 438 | <b>PIP5KL1</b>       | <b>phosphatidylinositol-4-phosphate 5-kinase-like 1</b> | <b>-4.26</b> | <b>0.02</b> |
| 439 | <b>CAPRIN2</b>       | <b>caprin family member 2</b>                           | <b>-4.24</b> | <b>0.02</b> |
| 440 | <b>DRC1</b>          | <b>dynein regulatory complex subunit 1</b>              | <b>-4.23</b> | <b>0.02</b> |
| 441 | <b>CDCA3</b>         | <b>cell division cycle associated 3</b>                 | <b>-4.23</b> | <b>0.02</b> |
| 442 | <b>GAS8</b>          | <b>growth arrest-specific 8</b>                         | <b>-4.21</b> | <b>0.02</b> |
| 443 | <b>KIAA1257</b>      | <b>KIAA1257</b>                                         | <b>-4.21</b> | <b>0.02</b> |
| 444 | <b>MACROD2</b>       | <b>MACRO domain containing 2</b>                        | <b>-4.19</b> | <b>0.02</b> |
| 445 | <b>GAB1</b>          | <b>GRB2-associated binding protein 1</b>                | <b>-4.19</b> | <b>0.02</b> |

|     |              |                                                                                             |       |      |
|-----|--------------|---------------------------------------------------------------------------------------------|-------|------|
| 446 | STS          | steroid sulfatase (microsomal), isozyme S                                                   | -4.16 | 0.02 |
| 447 | ATP11A       | ATPase, class VI, type 11A                                                                  | -4.16 | 0.02 |
| 448 | ZNF2         | zinc finger protein 2                                                                       | -4.16 | 0.02 |
| 449 | TRAF3IP2     | TRAF3 interacting protein 2                                                                 | -4.12 | 0.02 |
| 450 | LOC100507537 | uncharacterized LOC100507537                                                                | -4.11 | 0.02 |
| 451 | DHTKD1       | dehydrogenase E1 and transketolase domain containing 1                                      | -4.11 | 0.02 |
| 452 | KBTBD8       | kelch repeat and BTB (POZ) domain containing 8                                              | -4.10 | 0.02 |
| 453 | NGRN         | neugrin, neurite outgrowth associated                                                       | -4.10 | 0.02 |
| 454 | TRAF3        | TNF receptor-associated factor 3                                                            | -4.09 | 0.02 |
| 455 | ZNF76        | zinc finger protein 76                                                                      | -4.08 | 0.02 |
| 456 | ZNF510       | zinc finger protein 510                                                                     | -4.08 | 0.02 |
| 457 | COLQ         | collagen-like tail subunit (single strand of homotrimer) of asymmetric acetylcholinesterase | -4.07 | 0.02 |
| 458 | SLC9A1       | solute carrier family 9, subfamily A (NHE1, cation proton antiporter 1), member 1           | -4.05 | 0.02 |
| 459 | USP38        | ubiquitin specific peptidase 38                                                             | -4.04 | 0.02 |
| 460 | ZNF764       | zinc finger protein 764                                                                     | -4.02 | 0.02 |
| 461 | KCNK13       | potassium channel, two pore domain subfamily K, member 13                                   | -4.01 | 0.02 |
| 462 | POC1A        | POC1 centriolar protein A                                                                   | -4.00 | 0.02 |
| 463 | BMS1P20      | BMS1 pseudogene 20                                                                          | -4.00 | 0.02 |
| 464 | SH3BGRL2     | SH3 domain binding glutamate-rich protein like 2                                            | -3.99 | 0.02 |
| 465 | C8orf31      | chromosome 8 open reading frame 31                                                          | -3.97 | 0.02 |
| 466 | TMEM86A      | transmembrane protein 86A                                                                   | -3.94 | 0.02 |
| 467 | SCMH1        | sex comb on midleg homolog 1 (Drosophila)                                                   | -3.92 | 0.02 |
| 468 | HERC2        | HECT and RLD domain containing E3 ubiquitin protein ligase 2                                | -3.92 | 0.02 |
| 469 | C9orf9       | chromosome 9 open reading frame 9                                                           | -3.91 | 0.02 |
| 470 | CYP7A1       | cytochrome P450, family 7, subfamily A, polypeptide 1                                       | -3.91 | 0.02 |

|     |            |                                                                |       |      |
|-----|------------|----------------------------------------------------------------|-------|------|
| 471 | VPS13A     | vacuolar protein sorting 13 homolog A ( <i>S. cerevisiae</i> ) | -3.88 | 0.02 |
| 472 | SENP8      | SUMO/sentrin specific peptidase family member 8                | -3.88 | 0.02 |
| 473 | NAPEPLD    | N-acyl phosphatidylethanolamine phospholipase D                | -3.87 | 0.02 |
| 474 | DNAJC18    | DnaJ (Hsp40) homolog, subfamily C, member 18                   | -3.85 | 0.02 |
| 475 | PCDH1      | protocadherin 1                                                | -3.84 | 0.02 |
| 476 | BAG3       | BCL2-associated athanogene 3                                   | -3.83 | 0.02 |
| 477 | C1orf86    | chromosome 1 open reading frame 86                             | -3.83 | 0.02 |
| 478 | SPATA5     | spermatogenesis associated 5                                   | -3.83 | 0.02 |
| 479 | ZNF197     | zinc finger protein 197                                        | -3.82 | 0.02 |
| 480 | ZFAND3     | zinc finger, AN1-type domain 3                                 | -3.81 | 0.02 |
| 481 | IL37       | interleukin 37                                                 | -3.80 | 0.02 |
| 482 | HSPA13     | heat shock protein 70kDa family, member 13                     | -3.80 | 0.02 |
| 483 | PGS1       | phosphatidylglycerophosphate synthase 1                        | -3.80 | 0.02 |
| 484 | LINC00476  | long intergenic non-protein coding RNA 476                     | -3.79 | 0.02 |
| 485 | CSPP1      | centrosome and spindle pole associated protein 1               | -3.76 | 0.02 |
| 486 | STK3       | serine/threonine kinase 3                                      | -3.74 | 0.02 |
| 487 | ZRANB1     | zinc finger, RAN-binding domain containing 1                   | -3.69 | 0.02 |
| 488 | ING3       | inhibitor of growth family, member 3                           | -3.68 | 0.02 |
| 489 | SP4        | Sp4 transcription factor                                       | -3.66 | 0.04 |
| 490 | CLDN14     | claudin 14                                                     | -3.63 | 0.02 |
| 491 | ABHD12     | abhydrolase domain containing 12                               | -3.62 | 0.02 |
| 492 | DPY19L1P1  | DPY19L1 pseudogene 1                                           | -3.62 | 0.02 |
| 493 | FAM27E3    | family with sequence similarity 27, member E3                  | -3.61 | 0.02 |
| 494 | PLCB3      | phospholipase C, beta 3 (phosphatidylinositol-specific)        | -3.59 | 0.02 |
| 495 | FZD5       | frizzled class receptor 5                                      | -3.56 | 0.02 |
| 496 | GTF2I      | general transcription factor Iii                               | -3.55 | 0.02 |
| 497 | ARRDC1-AS1 | ARRDC1 antisense RNA 1                                         | -3.53 | 0.02 |
| 498 | APP        | amyloid beta (A4) precursor protein                            | -3.52 | 0.02 |

|     |              |                                                                                     |       |      |
|-----|--------------|-------------------------------------------------------------------------------------|-------|------|
| 499 | FXR2         | fragile X mental retardation, autosomal homolog 2                                   | -3.52 | 0.02 |
| 500 | NUP93        | nucleoporin 93kDa                                                                   | -3.51 | 0.02 |
| 501 | FLJ32255     | uncharacterized LOC643977                                                           | -3.51 | 0.02 |
| 502 | SCLY         | selenocysteinylase                                                                  | -3.49 | 0.02 |
| 503 | AGAP1        | ArfGAP with GTPase domain, ankyrin repeat and PH domain 1                           | -3.49 | 0.02 |
| 504 | LOC101928068 | uncharacterized LOC101928068                                                        | -3.48 | 0.02 |
| 505 | ZRANB3       | zinc finger, RAN-binding domain containing 3                                        | -3.47 | 0.02 |
| 506 | SPATA24      | spermatogenesis associated 24                                                       | -3.46 | 0.02 |
| 507 | MAK          | male germ cell-associated kinase                                                    | -3.46 | 0.04 |
| 508 | BAP1         | BRCA1 associated protein-1 (ubiquitin carboxy-terminal hydrolase)                   | -3.45 | 0.02 |
| 509 | HERC4        | HECT and RLD domain containing E3 ubiquitin protein ligase 4                        | -3.44 | 0.02 |
| 510 | ARHGAP27     | Rho GTPase activating protein 27                                                    | -3.44 | 0.02 |
| 511 | ERLIN1       | ER lipid raft associated 1                                                          | -3.44 | 0.02 |
| 512 | PRR11        | proline rich 11                                                                     | -3.43 | 0.02 |
| 513 | ZNF799       | zinc finger protein 799                                                             | -3.42 | 0.02 |
| 514 | ZNF530       | zinc finger protein 530                                                             | -3.41 | 0.02 |
| 515 | WDR19        | WD repeat domain 19                                                                 | -3.40 | 0.02 |
| 516 | RPRD2        | regulation of nuclear pre-mRNA domain containing 2                                  | -3.40 | 0.02 |
| 517 | C9orf66      | chromosome 9 open reading frame 66                                                  | -3.40 | 0.02 |
| 518 | SLC9B2       | solute carrier family 9, subfamily B (NHA2, cation proton antiporter 2), member 2   | -3.38 | 0.02 |
| 519 | ZACN         | zinc activated ligand-gated ion channel                                             | -3.37 | 0.02 |
| 520 | XRCC6P5      | X-ray repair complementing defective repair in Chinese hamster cells 6 pseudogene 5 | -3.37 | 0.02 |
| 521 | LOC101927418 | uncharacterized LOC101927418                                                        | -3.35 | 0.02 |
| 522 | ZNF35        | zinc finger protein 35                                                              | -3.34 | 0.02 |
| 523 | CALM3        | calmodulin 3 (phosphorylase kinase, delta)                                          | -3.32 | 0.02 |
| 524 | GAS6         | growth arrest-specific 6                                                            | -3.32 | 0.02 |



|     |          |                                                                 |       |      |
|-----|----------|-----------------------------------------------------------------|-------|------|
| 525 | CRHBP    | corticotropin releasing hormone binding protein                 | -3.31 | 0.02 |
| 526 | ABCF2    | ATP-binding cassette, sub-family F (GCN20), member 2            | -3.30 | 0.02 |
| 527 | MIB1     | mindbomb E3 ubiquitin protein ligase 1                          | -3.30 | 0.02 |
| 528 | RABL3    | RAB, member of RAS oncogene family-like 3                       | -3.30 | 0.02 |
| 529 | NCOA5    | nuclear receptor coactivator 5                                  | -3.29 | 0.02 |
| 530 | SLC5A5   | solute carrier family 5 (sodium/iodide cotransporter), member 5 | -3.28 | 0.02 |
| 531 | MEPCE    | methylphosphate capping enzyme                                  | -3.27 | 0.02 |
| 532 | PIGG     | phosphatidylinositol glycan anchor biosynthesis, class G        | -3.26 | 0.02 |
| 533 | SPDYE3   | speedy/RINGO cell cycle regulator family member E3              | -3.24 | 0.02 |
| 534 | NDE1     | nudE neurodevelopment protein 1                                 | -3.24 | 0.02 |
| 535 | PGS1     | phosphatidylglycerophosphate synthase 1                         | -3.23 | 0.02 |
| 536 | CCDC57   | coiled-coil domain containing 57                                | -3.23 | 0.02 |
| 537 | BRD4     | bromodomain containing 4                                        | -3.22 | 0.02 |
| 538 | ANKRD9   | ankyrin repeat domain 9                                         | -3.20 | 0.02 |
| 539 | VCX3A    | variable charge, X-linked 3A                                    | -3.17 | 0.02 |
| 540 | TFDP1    | transcription factor Dp-1                                       | -3.16 | 0.02 |
| 541 | HSD17B12 | hydroxysteroid (17-beta) dehydrogenase 12                       | -3.16 | 0.02 |
| 542 | RFPL1S   | RFPL1 antisense RNA 1                                           | -3.14 | 0.02 |
| 543 | MED16    | mediator complex subunit 16                                     | -3.14 | 0.02 |
| 544 | HSD11B1L | hydroxysteroid (11-beta) dehydrogenase 1-like                   | -3.13 | 0.02 |
| 545 | AGPAT6   | 1-acylglycerol-3-phosphate O-acyltransferase 6                  | -3.13 | 0.02 |
| 546 | TRIM65   | tripartite motif containing 65                                  | -3.12 | 0.02 |
| 547 | EXOGL    | endo/exonuclease (5'-3'), endonuclease G-like                   | -3.09 | 0.02 |
| 548 | FNDC3A   | fibronectin type III domain containing 3A                       | -3.03 | 0.02 |
| 549 | WWOX     | WW domain containing oxidoreductase                             | -3.02 | 0.02 |
| 550 | UTP14A   | UTP14, U3 small nucleolar ribonucleoprotein, homolog A (yeast)  | -3.00 | 0.02 |

- (iv) Differentially expressed genes between COPD Smoker and COPD Ex smoker having FC>3 and p value<0.05

| S.No | GeneSymbol | GeneName                                              | FC    | p value |
|------|------------|-------------------------------------------------------|-------|---------|
| 1    | GFM1       | G elongation factor, mitochondrial 1                  | -5.68 | 0.02    |
| 2    | TRIM60     | tripartite motif containing 60                        | -3.60 | 0.02    |
| 3    | lnc-OTX2-3 | lnc-OTX2-3:1                                          | -3.44 | 0.02    |
| 4    | CRISP3     | cysteine-rich secretory protein 3                     | -3.32 | 0.02    |
| 5    | TNFRSF19   | tumor necrosis factor receptor superfamily, member 19 | -3.10 | 0.02    |

- (v) Differentially expressed genes between COPD Smoker and Control Never Smoker having FC>3 and p value<0.05

| S.No | GeneSymbol | GeneName                                                                                       | FC      | p value |
|------|------------|------------------------------------------------------------------------------------------------|---------|---------|
| 1    | GFM1       | G elongation factor, mitochondrial 1                                                           | -155.93 | 0.02    |
| 2    | SLC6A14    | solute carrier family 6 (amino acid transporter), member 14                                    | -114.57 | 0.02    |
| 3    | VLDLR      | very low density lipoprotein receptor                                                          | -104.45 | 0.02    |
| 4    | MAGI2-AS3  | MAGI2 antisense RNA 3                                                                          | -103.60 | 0.02    |
| 5    | CCDC68     | coiled-coil domain containing 68                                                               | -102.63 | 0.02    |
| 6    | MLLT4      | myeloid/lymphoid or mixed-lineage leukemia (trithorax homolog, Drosophila); translocated to, 4 | -99.64  | 0.02    |
| 7    | TNFRSF19   | tumor necrosis factor receptor superfamily, member 19                                          | -98.23  | 0.02    |
| 8    | PHLPP1     | PH domain and leucine rich repeat protein phosphatase 1                                        | -95.34  | 0.02    |
| 9    | ZNF229     | zinc finger protein 229                                                                        | -89.13  | 0.02    |
| 10   | PCDHB10    | protocadherin beta 10                                                                          | -87.15  | 0.02    |
| 11   | PLN        | phospholamban                                                                                  | -86.83  | 0.02    |
| 12   | CRISP3     | cysteine-rich secretory protein 3                                                              | -83.34  | 0.02    |
| 13   | TUBB2B     | tubulin, beta 2B class IIb                                                                     | -81.91  | 0.02    |
| 14   | lnc-ESR2-1 | lnc-ESR2-1:1                                                                                   | -79.70  | 0.02    |
| 15   | IQCH       | IQ motif containing H                                                                          | -74.57  | 0.02    |
| 16   | LCE1B      | late cornified envelope 1B                                                                     | -74.33  | 0.02    |
| 17   | CERS3      | ceramide synthase 3                                                                            | -73.46  | 0.02    |

|    |              |                                                                                                                                             |        |      |
|----|--------------|---------------------------------------------------------------------------------------------------------------------------------------------|--------|------|
| 18 | TEKT1        | tektin 1                                                                                                                                    | -72.54 | 0.02 |
| 19 | TP53BP1      | tumor protein p53 binding protein 1                                                                                                         | -69.95 | 0.02 |
| 20 | NKAIN3       | Na <sup>+</sup> /K <sup>+</sup> transporting ATPase interacting 3                                                                           | -68.77 | 0.02 |
| 21 | AASDH        | aminoadipate-semialdehyde dehydrogenase                                                                                                     | -68.54 | 0.02 |
| 22 | lnc-DR1-1    | lnc-DR1-1:1                                                                                                                                 | -67.47 | 0.02 |
| 23 | FAM13A       | family with sequence similarity 13, member A                                                                                                | -66.29 | 0.02 |
| 24 | MID1         | midline 1                                                                                                                                   | -65.78 | 0.02 |
| 25 | LOC286071    | uncharacterized LOC286071                                                                                                                   | -65.16 | 0.02 |
| 26 | STEAP1       | six transmembrane epithelial antigen of the prostate 1                                                                                      | -65.13 | 0.02 |
| 27 | LINC01192    | long intergenic non-protein coding RNA 1192                                                                                                 | -64.47 | 0.02 |
| 28 | C1QL3        | complement component 1, q subcomponent-like 3                                                                                               | -63.91 | 0.02 |
| 29 | ADARB1       | adenosine deaminase, RNA-specific, B1                                                                                                       | -63.90 | 0.02 |
| 30 | THSD7A       | thrombospondin, type I, domain containing 7A                                                                                                | -63.13 | 0.02 |
| 31 | C2orf80      | chromosome 2 open reading frame 80                                                                                                          | -62.82 | 0.02 |
| 32 | RGS17        | regulator of G-protein signaling 17                                                                                                         | -61.44 | 0.02 |
| 33 | LOC101929683 | uncharacterized LOC101929683                                                                                                                | -61.33 | 0.02 |
| 34 | FAM53B-AS1   | FAM53B antisense RNA 1                                                                                                                      | -60.90 | 0.02 |
| 35 | KLHL29       | kelch-like family member 29                                                                                                                 | -59.84 | 0.02 |
| 36 | lnc-AKR1C3-1 | lnc-AKR1C3-1:1                                                                                                                              | -59.27 | 0.02 |
| 37 | SLC26A7      | solute carrier family 26 (anion exchanger), member 7                                                                                        | -59.23 | 0.02 |
| 38 | TRIM60       | tripartite motif containing 60                                                                                                              | -57.21 | 0.02 |
| 39 | SLITRK5      | SLIT and NTRK-like family, member 5                                                                                                         | -57.17 | 0.02 |
| 40 | COLCA2       | colorectal cancer associated 2                                                                                                              | -55.22 | 0.02 |
| 41 | lnc-SNURF-3  | lnc-SNURF-3:21                                                                                                                              | -54.16 | 0.02 |
| 42 | SEMA5A       | sema domain, seven thrombospondin repeats (type 1 and type 1-like), transmembrane domain (TM) and short cytoplasmic domain, (semaphorin) 5A | -53.93 | 0.02 |
| 43 | AQP11        | aquaporin 11                                                                                                                                | -53.81 | 0.02 |
| 44 | GBP7         | guanylate binding protein 7                                                                                                                 | -53.60 | 0.02 |
| 45 | SPDYA        | speedy/RINGO cell cycle regulator family member A                                                                                           | -53.09 | 0.02 |

|    |              |                                                                                        |        |      |
|----|--------------|----------------------------------------------------------------------------------------|--------|------|
| 46 | SLC13A1      | solute carrier family 13 (sodium/sulfate symporter), member 1                          | -53.00 | 0.02 |
| 47 | RSPO2        | R-spondin 2                                                                            | -52.96 | 0.02 |
| 48 | SLC5A7       | solute carrier family 5 (sodium/choline cotransporter), member 7                       | -52.67 | 0.02 |
| 49 | LINC00656    | long intergenic non-protein coding RNA 656                                             | -52.65 | 0.02 |
| 50 | CDH6         | cadherin 6, type 2, K-cadherin (fetal kidney)                                          | -52.63 | 0.02 |
| 51 | LINC00403    | long intergenic non-protein coding RNA 403                                             | -52.43 | 0.02 |
| 52 | AVPR1A       | arginine vasopressin receptor 1A                                                       | -51.89 | 0.02 |
| 53 | LOC642620    | uncharacterized LOC642620                                                              | -51.71 | 0.02 |
| 54 | AGXT         | alanine-glyoxylate aminotransferase                                                    | -51.01 | 0.02 |
| 55 | FAM149B1     | family with sequence similarity 149, member B1                                         | -50.77 | 0.02 |
| 56 | MAGEB3       | melanoma antigen family B, 3                                                           | -50.66 | 0.02 |
| 57 | DYNC2H1      | dynein, cytoplasmic 2, heavy chain 1                                                   | -50.46 | 0.02 |
| 58 | AFF2         | AF4/FMR2 family, member 2                                                              | -50.39 | 0.02 |
| 59 | C17orf104    | chromosome 17 open reading frame 104                                                   | -49.67 | 0.02 |
| 60 | LYPD1        | LY6/PLAUR domain containing 1                                                          | -49.33 | 0.02 |
| 61 | SEMA3E       | sema domain, immunoglobulin domain (Ig), short basic domain, secreted, (semaphorin) 3E | -49.20 | 0.02 |
| 62 | LOC100507277 | uncharacterized LOC100507277                                                           | -49.15 | 0.02 |
| 63 | RHAG         | Rh-associated glycoprotein                                                             | -49.12 | 0.02 |
| 64 | PCDHGA5      | protocadherin gamma subfamily A, 5                                                     | -48.94 | 0.02 |
| 65 | ATP13A4      | ATPase type 13A4                                                                       | -48.17 | 0.02 |
| 66 | MIR1245A     | microRNA 1245a                                                                         | -47.88 | 0.02 |
| 67 | lnc-PDE4D-1  | lnc-PDE4D-1:1                                                                          | -47.69 | 0.02 |
| 68 | HMMR-AS1     | HMMR antisense RNA 1                                                                   | -47.52 | 0.02 |
| 69 | ATF7         | activating transcription factor 7                                                      | -47.44 | 0.02 |
| 70 | CARD14       | caspase recruitment domain family, member 14                                           | -47.15 | 0.02 |
| 71 | NDC80        | NDC80 kinetochore complex component                                                    | -46.97 | 0.02 |
| 72 | KLHL1        | kelch-like family member 1                                                             | -46.93 | 0.02 |

|     |              |                                                                        |        |      |
|-----|--------------|------------------------------------------------------------------------|--------|------|
| 73  | LOC101928036 | uncharacterized<br>LOC101928036                                        | -46.90 | 0.02 |
| 74  | APBB2        | amyloid beta (A4) precursor<br>protein-binding, family B,<br>member 2  | -46.30 | 0.02 |
| 75  | LOC101929475 | uncharacterized<br>LOC101929475                                        | -45.75 | 0.02 |
| 76  | BHMT2        | betaine--homocysteine S-<br>methyltransferase 2                        | -45.71 | 0.02 |
| 77  | LHX6         | LIM homeobox 6                                                         | -45.64 | 0.02 |
| 78  | SLC10A7      | solute carrier family 10,<br>member 7                                  | -45.56 | 0.02 |
| 79  | CBLN1        | cerebellin 1 precursor                                                 | -45.35 | 0.02 |
| 80  | CYP4X1       | cytochrome P450, family 4,<br>subfamily X, polypeptide 1               | -45.30 | 0.02 |
| 81  | DPP10        | dipeptidyl-peptidase 10 (non-<br>functional)                           | -45.28 | 0.02 |
| 82  | AMOT         | angiomin                                                               | -45.05 | 0.02 |
| 83  | SLC6A3       | solute carrier family 6<br>(neurotransmitter<br>transporter), member 3 | -44.97 | 0.02 |
| 84  | ZFP28        | ZFP28 zinc finger protein                                              | -44.93 | 0.02 |
| 85  | SALL1        | spalt-like transcription factor<br>1                                   | -44.91 | 0.02 |
| 86  | IFNA8        | interferon, alpha 8                                                    | -44.36 | 0.02 |
| 87  | COL6A3       | collagen, type VI, alpha 3                                             | -44.09 | 0.02 |
| 88  | SPO11        | SPO11 meiotic protein<br>covalently bound to DSB                       | -44.08 | 0.02 |
| 89  | GRIK2        | glutamate receptor,<br>ionotropic, kainate 2                           | -44.01 | 0.02 |
| 90  | ANKRD62      | ankyrin repeat domain 62                                               | -43.96 | 0.02 |
| 91  | NOX4         | NADPH oxidase 4                                                        | -43.85 | 0.02 |
| 92  | GABRG2       | gamma-aminobutyric acid<br>(GABA) A receptor, gamma<br>2               | -43.54 | 0.02 |
| 93  | ZIC2         | Zic family member 2                                                    | -43.23 | 0.02 |
| 94  | LOC100996573 | uncharacterized<br>LOC100996573                                        | -43.05 | 0.02 |
| 95  | SPAG16       | sperm associated antigen 16                                            | -42.82 | 0.02 |
| 96  | Inc-OTX2-3   | Inc-OTX2-3:1                                                           | -42.81 | 0.02 |
| 97  | MARK4        | MAP/microtubule affinity-<br>regulating kinase 4                       | -42.66 | 0.02 |
| 98  | DLGAP1       | discs, large (Drosophila)<br>homolog-associated protein 1              | -42.62 | 0.02 |
| 99  | DUSP21       | dual specificity phosphatase<br>21                                     | -42.61 | 0.02 |
| 100 | LOC101928794 | uncharacterized<br>LOC101928794                                        | -42.56 | 0.02 |

|     |                |                                                               |        |      |
|-----|----------------|---------------------------------------------------------------|--------|------|
| 101 | SALL3          | spalt-like transcription factor 3                             | -42.51 | 0.02 |
| 102 | DMD            | dystrophin                                                    | -42.21 | 0.02 |
| 103 | DIRAS3         | DIRAS family, GTP-binding RAS-like 3                          | -42.19 | 0.02 |
| 104 | LOC100131864   | uncharacterized LOC100131864                                  | -42.17 | 0.02 |
| 105 | lnc-FAM189A1-3 | lnc-FAM189A1-3:1                                              | -42.07 | 0.02 |
| 106 | GJD4           | gap junction protein, delta 4, 40.1kDa                        | -41.92 | 0.02 |
| 107 | DCC            | DCC netrin 1 receptor                                         | -41.80 | 0.02 |
| 108 | ADAMTSL1       | ADAMTS-like 1                                                 | -41.75 | 0.02 |
| 109 | LHX9           | LIM homeobox 9                                                | -41.72 | 0.02 |
| 110 | TMEM257        | transmembrane protein 257                                     | -41.70 | 0.02 |
| 111 | LINC00615      | long intergenic non-protein coding RNA 615                    | -41.47 | 0.02 |
| 112 | ZNF471         | zinc finger protein 471                                       | -41.46 | 0.02 |
| 113 | TRAF3IP2       | TRAF3 interacting protein 2                                   | -41.35 | 0.02 |
| 114 | XKR6           | XK, Kell blood group complex subunit-related family, member 6 | -41.34 | 0.02 |
| 115 | INSM1          | insulinoma-associated 1                                       | -40.97 | 0.02 |
| 116 | C15orf56       | chromosome 15 open reading frame 56                           | -40.91 | 0.02 |
| 117 | WFDC10A        | WAP four-disulfide core domain 10A                            | -40.80 | 0.02 |
| 118 | DPY19L2        | dpy-19-like 2 (C. elegans)                                    | -40.77 | 0.02 |
| 119 | ANGPT1         | angiopoietin 1                                                | -40.74 | 0.02 |
| 120 | CNTFR          | ciliary neurotrophic factor receptor                          | -40.59 | 0.02 |
| 121 | PCDHGB6        | protocadherin gamma subfamily B, 6                            | -40.51 | 0.02 |
| 122 | GLP1R          | glucagon-like peptide 1 receptor                              | -40.38 | 0.02 |
| 123 | LRRC55         | leucine rich repeat containing 55                             | -40.22 | 0.02 |
| 124 | VSTM2L         | V-set and transmembrane domain containing 2 like              | -40.22 | 0.02 |
| 125 | CADM2          | cell adhesion molecule 2                                      | -40.21 | 0.02 |
| 126 | NCAM2          | neural cell adhesion molecule 2                               | -40.14 | 0.02 |
| 127 | lnc-GFAP-1     | lnc-GFAP-1:1                                                  | -40.09 | 0.02 |
| 128 | GRM1           | glutamate receptor, metabotropic 1                            | -39.97 | 0.02 |
| 129 | SFXN1          | sideroflexin 1                                                | -39.57 | 0.02 |
| 130 | SFRP2          | secreted frizzled-related protein 2                           | -39.44 | 0.02 |

|     |               |                                                                                  |        |      |
|-----|---------------|----------------------------------------------------------------------------------|--------|------|
| 131 | FLRT2         | fibronectin leucine rich transmembrane protein 2                                 | -39.17 | 0.02 |
| 132 | ZNF682        | zinc finger protein 682                                                          | -38.73 | 0.02 |
| 133 | CAPN11        | calpain 11                                                                       | -38.68 | 0.02 |
| 134 | MMP20         | matrix metalloproteinase 20                                                      | -38.56 | 0.02 |
| 135 | LUM           | lumican                                                                          | -38.34 | 0.02 |
| 136 | KRT12         | keratin 12, type I                                                               | -38.14 | 0.02 |
| 137 | UTS2B         | urotensin 2B                                                                     | -38.10 | 0.02 |
| 138 | TIE1          | tyrosine kinase with immunoglobulin-like and EGF-like domains 1                  | -37.82 | 0.02 |
| 139 | MBTPS2        | membrane-bound transcription factor peptidase, site 2                            | -37.77 | 0.02 |
| 140 | PVRL3         | poliovirus receptor-related 3                                                    | -37.67 | 0.02 |
| 141 | WDR72         | WD repeat domain 72                                                              | -37.63 | 0.02 |
| 142 | LRP2BP        | LRP2 binding protein                                                             | -37.41 | 0.02 |
| 143 | PRKAA2        | protein kinase, AMP-activated, alpha 2 catalytic subunit                         | -37.27 | 0.02 |
| 144 | PNPO          | pyridoxamine 5'-phosphate oxidase                                                | -37.02 | 0.02 |
| 145 | DNAH14        | dynein, axonemal, heavy chain 14                                                 | -36.99 | 0.02 |
| 146 | SYNE1         | spectrin repeat containing, nuclear envelope 1                                   | -36.83 | 0.02 |
| 147 | lnc-C3orf65-1 | lnc-C3orf65-1:1                                                                  | -36.76 | 0.02 |
| 148 | FAM47E        | family with sequence similarity 47, member E                                     | -35.28 | 0.02 |
| 149 | PCDHB2        | protocadherin beta 2                                                             | -34.90 | 0.02 |
| 150 | SCAMPER       | sphingolipid Ca <sup>2+</sup> release mediating protein of endoplasmic reticulum | -34.51 | 0.02 |
| 151 | IL22RA1       | interleukin 22 receptor, alpha 1                                                 | -34.26 | 0.02 |
| 152 | CCM2L         | cerebral cavernous malformation 2-like                                           | -34.20 | 0.02 |
| 153 | FBLIM1        | filamin binding LIM protein 1                                                    | -34.14 | 0.02 |
| 154 | COL19A1       | collagen, type XIX, alpha 1                                                      | -33.93 | 0.02 |
| 155 | CCDC113       | coiled-coil domain containing 113                                                | -33.62 | 0.02 |
| 156 | PTPRZ1        | protein tyrosine phosphatase, receptor-type, Z polypeptide 1                     | -33.20 | 0.02 |
| 157 | DKK3          | dickkopf WNT signaling pathway inhibitor 3                                       | -30.69 | 0.02 |

|     |             |                                                                     |        |      |
|-----|-------------|---------------------------------------------------------------------|--------|------|
| 158 | BMP7        | bone morphogenetic protein 7                                        | -30.06 | 0.02 |
| 159 | CCDC144A    | coiled-coil domain containing 144A                                  | -28.93 | 0.02 |
| 160 | SPERT       | spermatid associated                                                | -27.72 | 0.02 |
| 161 | LRRIQ1      | leucine-rich repeats and IQ motif containing 1                      | -27.29 | 0.02 |
| 162 | MLPH        | melanophilin                                                        | -27.13 | 0.02 |
| 163 | MYH7B       | myosin, heavy chain 7B, cardiac muscle, beta                        | -26.96 | 0.02 |
| 164 | SRGAP3      | SLIT-ROBO Rho GTPase activating protein 3                           | -25.91 | 0.02 |
| 165 | PHC3        | polyhomeotic homolog 3 (Drosophila)                                 | -21.89 | 0.02 |
| 166 | SLC30A8     | solute carrier family 30 (zinc transporter), member 8               | -20.54 | 0.02 |
| 167 | NR0B1       | nuclear receptor subfamily 0, group B, member 1                     | -20.27 | 0.02 |
| 168 | WDR62       | WD repeat domain 62                                                 | -20.19 | 0.02 |
| 169 | ECM2        | extracellular matrix protein 2, female organ and adipocyte specific | -18.77 | 0.02 |
| 170 | CTGF        | connective tissue growth factor                                     | -18.73 | 0.02 |
| 171 | PDP2        | pyruvate dehydrogenase phosphatase catalytic subunit 2              | -18.67 | 0.02 |
| 172 | FOXP2       | forkhead box P2                                                     | -18.36 | 0.02 |
| 173 | C5orf66-AS2 | C5orf66 antisense RNA 2                                             | -17.62 | 0.02 |
| 174 | lnc-FZD4-1  | lnc-FZD4-1:2                                                        | -15.92 | 0.02 |
| 175 | LIPH        | lipase, member H                                                    | -15.62 | 0.02 |
| 176 | DCAF12L1    | DDB1 and CUL4 associated factor 12-like 1                           | -15.40 | 0.02 |
| 177 | CCP110      | centriolar coiled coil protein 110kDa                               | -15.34 | 0.02 |
| 178 | UACA        | uveal autoantigen with coiled-coil domains and ankyrin repeats      | -15.24 | 0.02 |
| 179 | RGS4        | regulator of G-protein signaling 4                                  | -15.21 | 0.02 |
| 180 | TTY12       | testis-specific transcript, Y-linked 12 (non-protein coding)        | -14.92 | 0.02 |
| 181 | RBMY1E      | RNA binding motif protein, Y-linked, family 1, member E             | -14.74 | 0.02 |
| 182 | FRMD3       | FERM domain containing 3                                            | -14.35 | 0.02 |
| 183 | BRCA2       | breast cancer 2, early onset                                        | -14.29 | 0.02 |



|     |              |                                                                          |        |      |
|-----|--------------|--------------------------------------------------------------------------|--------|------|
| 184 | HOGA1        | 4-hydroxy-2-oxoglutarate aldolase 1                                      | -13.56 | 0.02 |
| 185 | C8orf34      | chromosome 8 open reading frame 34                                       | -13.25 | 0.02 |
| 186 | FHAD1        | forkhead-associated (FHA) phosphopeptide binding domain 1                | -13.21 | 0.02 |
| 187 | PRDM9        | PR domain containing 9                                                   | -13.21 | 0.02 |
| 188 | ACACA        | acetyl-CoA carboxylase alpha                                             | -13.15 | 0.02 |
| 189 | NMNAT2       | nicotinamide nucleotide adenylyltransferase 2                            | -12.75 | 0.02 |
| 190 | CASC5        | cancer susceptibility candidate 5                                        | -12.60 | 0.02 |
| 191 | PGAP1        | post-GPI attachment to proteins 1                                        | -12.35 | 0.02 |
| 192 | CDH26        | cadherin 26                                                              | -11.92 | 0.02 |
| 193 | TCTN1        | tectonic family member 1                                                 | -11.09 | 0.02 |
| 194 | ACSS3        | acyl-CoA synthetase short-chain family member 3                          | -11.03 | 0.02 |
| 195 | PUS10        | pseudouridylate synthase 10                                              | -11.01 | 0.02 |
| 196 | THOC5        | THO complex 5                                                            | -10.99 | 0.02 |
| 197 | STRBP        | spermatid perinuclear RNA binding protein                                | -10.95 | 0.02 |
| 198 | BRIP1        | BRCA1 interacting protein C-terminal helicase 1                          | -10.82 | 0.02 |
| 199 | PIANP        | PILR alpha associated neural protein                                     | -10.55 | 0.02 |
| 200 | TXNL1        | thioredoxin-like 1                                                       | -10.54 | 0.02 |
| 201 | SLC25A5-AS1  | SLC25A5 antisense RNA 1                                                  | -10.47 | 0.02 |
| 202 | SPINK6       | serine peptidase inhibitor, Kazal type 6                                 | -10.40 | 0.02 |
| 203 | TRIM48       | tripartite motif containing 48                                           | -10.28 | 0.02 |
| 204 | FMNL3        | formin-like 3                                                            | -10.21 | 0.02 |
| 205 | INTS1        | integrator complex subunit 1                                             | -10.10 | 0.02 |
| 206 | lnc-ANTXRL-2 | lnc-ANTXRL-2:1                                                           | -10.10 | 0.02 |
| 207 | ATP1B4       | ATPase, Na <sup>+</sup> /K <sup>+</sup> transporting, beta 4 polypeptide | -9.82  | 0.02 |
| 208 | MARVELD3     | MARVEL domain containing 3                                               | -9.81  | 0.02 |
| 209 | GLDN         | gliomedin                                                                | -9.80  | 0.02 |
| 210 | ZNF383       | zinc finger protein 383                                                  | -9.74  | 0.02 |
| 211 | GARNL3       | GTPase activating Rap/RanGAP domain-like 3                               | -9.73  | 0.02 |
| 212 | TPD52        | tumor protein D52                                                        | -9.51  | 0.02 |
| 213 | ZNF587B      | zinc finger protein 587B                                                 | -9.50  | 0.02 |
| 214 | IFT57        | intraflagellar transport 57                                              | -9.46  | 0.02 |

|     |              |                                                                                   |       |      |
|-----|--------------|-----------------------------------------------------------------------------------|-------|------|
| 215 | CASC10       | cancer susceptibility candidate 10                                                | -9.46 | 0.02 |
| 216 | SCN9A        | sodium channel, voltage gated, type IX alpha subunit                              | -9.44 | 0.02 |
| 217 | OTC          | ornithine carbamoyltransferase                                                    | -9.33 | 0.02 |
| 218 | ZNF251       | zinc finger protein 251                                                           | -9.31 | 0.02 |
| 219 | ENAH         | enabled homolog (Drosophila)                                                      | -9.21 | 0.02 |
| 220 | ULBP2        | UL16 binding protein 2                                                            | -9.19 | 0.02 |
| 221 | SLC35D1      | solute carrier family 35 (UDP-GlcA/UDP-GalNAc transporter), member D1             | -9.14 | 0.02 |
| 222 | HBM          | hemoglobin, mu                                                                    | -9.00 | 0.02 |
| 223 | LOC101927482 | uncharacterized LOC101927482                                                      | -8.58 | 0.02 |
| 224 | ZFP30        | ZFP30 zinc finger protein                                                         | -8.53 | 0.02 |
| 225 | HDAC6        | histone deacetylase 6                                                             | -8.44 | 0.02 |
| 226 | SLC25A26     | solute carrier family 25 (S-adenosylmethionine carrier), member 26                | -8.41 | 0.02 |
| 227 | FITM2        | fat storage-inducing transmembrane protein 2                                      | -8.33 | 0.02 |
| 228 | MYNN         | myoneurin                                                                         | -8.25 | 0.02 |
| 229 | EOGT         | EGF domain-specific O-linked N-acetylglucosamine (GlcNAc) transferase             | -8.21 | 0.02 |
| 230 | ETV3L        | ets variant 3-like                                                                | -8.20 | 0.02 |
| 231 | WDHD1        | WD repeat and HMG-box DNA binding protein 1                                       | -8.17 | 0.02 |
| 232 | ZFYVE16      | zinc finger, FYVE domain containing 16                                            | -8.10 | 0.02 |
| 233 | LOC643406    | uncharacterized LOC643406                                                         | -8.04 | 0.02 |
| 234 | STAG3L4      | stromal antigen 3-like 4 (pseudogene)                                             | -7.85 | 0.02 |
| 235 | ZFP2         | ZFP2 zinc finger protein                                                          | -7.79 | 0.02 |
| 236 | TRAF3IP2-AS1 | TRAF3IP2 antisense RNA 1                                                          | -7.77 | 0.02 |
| 237 | PLA2G10      | phospholipase A2, group X                                                         | -7.68 | 0.02 |
| 238 | SPARC        | secreted protein, acidic, cysteine-rich (osteonectin)                             | -7.61 | 0.02 |
| 239 | SLC9B1       | solute carrier family 9, subfamily B (NHA1, cation proton antiporter 1), member 1 | -7.60 | 0.02 |
| 240 | PRAMENP      | PRAME N-terminal-like, pseudogene                                                 | -7.57 | 0.02 |

|     |           |                                                                  |       |      |
|-----|-----------|------------------------------------------------------------------|-------|------|
| 241 | RSPH9     | radial spoke head 9 homolog (Chlamydomonas)                      | -7.35 | 0.02 |
| 242 | KIT       | v-kit Hardy-Zuckerman 4 feline sarcoma viral oncogene homolog    | -7.26 | 0.02 |
| 243 | RIC3      | RIC3 acetylcholine receptor chaperone                            | -7.25 | 0.02 |
| 244 | LRRC63    | leucine rich repeat containing 63                                | -7.21 | 0.02 |
| 245 | FAM27E2   | family with sequence similarity 27, member E2                    | -7.20 | 0.02 |
| 246 | ABCA11P   | ATP-binding cassette, sub-family A (ABC1), member 11, pseudogene | -7.20 | 0.02 |
| 247 | C1orf167  | chromosome 1 open reading frame 167                              | -7.13 | 0.02 |
| 248 | CALCR     | calcitonin receptor                                              | -7.03 | 0.02 |
| 249 | NF2       | neurofibromin 2 (merlin)                                         | -6.95 | 0.02 |
| 250 | ACSBG1    | acyl-CoA synthetase bubblegum family member 1                    | -6.91 | 0.02 |
| 251 | SUN3      | Sad1 and UNC84 domain containing 3                               | -6.83 | 0.02 |
| 252 | C9orf131  | chromosome 9 open reading frame 131                              | -6.78 | 0.02 |
| 253 | CAPN13    | calpain 13                                                       | -6.75 | 0.02 |
| 254 | GLUD1P7   | glutamate dehydrogenase 1 pseudogene 7                           | -6.75 | 0.02 |
| 255 | RBBP5     | retinoblastoma binding protein 5                                 | -6.72 | 0.02 |
| 256 | FBXO10    | F-box protein 10                                                 | -6.70 | 0.02 |
| 257 | AVPR2     | arginine vasopressin receptor 2                                  | -6.70 | 0.02 |
| 258 | DPYS      | dihydropyrimidinase                                              | -6.68 | 0.02 |
| 259 | ARHGEF10  | Rho guanine nucleotide exchange factor (GEF) 10                  | -6.66 | 0.02 |
| 260 | FLJ44715  | uncharacterized LOC386671                                        | -6.61 | 0.02 |
| 261 | ABCA10    | ATP-binding cassette, sub-family A (ABC1), member 10             | -6.53 | 0.02 |
| 262 | lnc-FAS-1 | lnc-FAS-1:1                                                      | -6.52 | 0.02 |
| 263 | C19orf80  | chromosome 19 open reading frame 80                              | -6.51 | 0.02 |
| 264 | P2RY12    | purinergic receptor P2Y, G-protein coupled, 12                   | -6.49 | 0.02 |
| 265 | MAPRE2    | microtubule-associated protein, RP/EB family, member 2           | -6.49 | 0.02 |
| 266 | DLGAP5    | discs, large (Drosophila) homolog-associated protein 5           | -6.48 | 0.02 |

|     |              |                                                          |       |      |
|-----|--------------|----------------------------------------------------------|-------|------|
| 267 | L3MBTL1      | l(3)mbt-like 1 (Drosophila)                              | -6.44 | 0.02 |
| 268 | lnc-WDR34-2  | lnc-WDR34-2:2                                            | -6.41 | 0.02 |
| 269 | ZNF551       | zinc finger protein 551                                  | -6.37 | 0.02 |
| 270 | COLEC11      | collectin sub-family member 11                           | -6.30 | 0.02 |
| 271 | HCG9         | HLA complex group 9 (non-protein coding)                 | -6.29 | 0.02 |
| 272 | STON2        | stonin 2                                                 | -6.29 | 0.02 |
| 273 | CD276        | CD276 molecule                                           | -6.27 | 0.02 |
| 274 | IL4          | interleukin 4                                            | -6.25 | 0.02 |
| 275 | LPPR4        | lipid phosphate phosphatase-related protein type 4       | -6.24 | 0.02 |
| 276 | RSPH4A       | radial spoke head 4 homolog A (Chlamydomonas)            | -6.20 | 0.02 |
| 277 | RNF38        | ring finger protein 38                                   | -6.20 | 0.02 |
| 278 | IER3IP1      | immediate early response 3 interacting protein 1         | -6.16 | 0.02 |
| 279 | ASTN1        | astrotactin 1                                            | -6.15 | 0.02 |
| 280 | TRAM1        | translocation associated membrane protein 1              | -6.14 | 0.02 |
| 281 | ERMN         | ermin, ERM-like protein                                  | -6.13 | 0.02 |
| 282 | PRAMEF19     | PRAME family member 19                                   | -6.03 | 0.02 |
| 283 | TNFRSF21     | tumor necrosis factor receptor superfamily, member 21    | -6.03 | 0.02 |
| 284 | CALB2        | calbindin 2                                              | -6.03 | 0.02 |
| 285 | C6orf52      | chromosome 6 open reading frame 52                       | -5.83 | 0.02 |
| 286 | TRIM17       | tripartite motif containing 17                           | -5.80 | 0.02 |
| 287 | VPS13B       | vacuolar protein sorting 13 homolog B (yeast)            | -5.72 | 0.02 |
| 288 | KLKB1        | kallikrein B, plasma (Fletcher factor) 1                 | -5.71 | 0.02 |
| 289 | BRWD1-IT2    | BRWD1 intronic transcript 2 (non-protein coding)         | -5.61 | 0.02 |
| 290 | ASH1L        | ash1 (absent, small, or homeotic)-like (Drosophila)      | -5.61 | 0.02 |
| 291 | LANCL2       | LanClantibioticsynthetase component C-like 2 (bacterial) | -5.61 | 0.02 |
| 292 | lnc-PCDH19-1 | lnc-PCDH19-1:1                                           | -5.56 | 0.02 |
| 293 | GPALPP1      | GPALPP motifs containing 1                               | -5.51 | 0.02 |
| 294 | CDC25B       | cell division cycle 25B                                  | -5.51 | 0.02 |
| 295 | MUC12        | mucin 12, cell surface associated                        | -5.40 | 0.02 |
| 296 | GAB1         | GRB2-associated binding protein 1                        | -5.40 | 0.02 |
| 297 | OLFML2A      | olfactomedin-like 2A                                     | -5.38 | 0.02 |

|     |                     |                                                                  |       |      |
|-----|---------------------|------------------------------------------------------------------|-------|------|
| 298 | <b>ORAOV1</b>       | oral cancer overexpressed 1                                      | -5.37 | 0.02 |
| 299 | <b>ELL3</b>         | elongation factor RNA polymerase II-like 3                       | -5.31 | 0.02 |
| 300 | <b>KBTBD8</b>       | kelch repeat and BTB (POZ) domain containing 8                   | -5.29 | 0.02 |
| 301 | <b>CNNM2</b>        | cyclin and CBS domain divalent metal cation transport mediator 2 | -5.29 | 0.02 |
| 302 | <b>MCM4</b>         | minichromosome maintenance complex component 4                   | -5.28 | 0.02 |
| 303 | <b>MRAP</b>         | melanocortin 2 receptor accessory protein                        | -5.27 | 0.02 |
| 304 | <b>GSTCD</b>        | glutathione S-transferase, C-terminal domain containing          | -5.27 | 0.02 |
| 305 | <b>lnc-GPR183-2</b> | lnc-GPR183-2:4                                                   | -5.26 | 0.02 |
| 306 | <b>BBS7</b>         | Bardet-Biedl syndrome 7                                          | -5.23 | 0.02 |
| 307 | <b>MFAP3</b>        | microfibrillar-associated protein 3                              | -5.20 | 0.02 |
| 308 | <b>RNF157</b>       | ring finger protein 157                                          | -5.19 | 0.02 |
| 309 | <b>KIAA1257</b>     | KIAA1257                                                         | -5.18 | 0.02 |
| 310 | <b>PPP2R3A</b>      | protein phosphatase 2, regulatory subunit B'', alpha             | -5.17 | 0.02 |
| 311 | <b>PHF8</b>         | PHD finger protein 8                                             | -5.15 | 0.02 |
| 312 | <b>ZSCAN2</b>       | zinc finger and SCAN domain containing 2                         | -5.13 | 0.02 |
| 313 | <b>HMG5</b>         | high mobility group nucleosome binding domain 5                  | -5.11 | 0.02 |
| 314 | <b>MCOLN2</b>       | mucolipin 2                                                      | -5.11 | 0.02 |
| 315 | <b>CUX1</b>         | cut-like homeobox 1                                              | -5.10 | 0.02 |
| 316 | <b>HNRNPM</b>       | heterogeneous nuclear ribonucleoprotein M                        | -5.08 | 0.02 |
| 317 | <b>FAM106CP</b>     | family with sequence similarity 106, member C, pseudogene        | -5.07 | 0.02 |
| 318 | <b>OTUD7B</b>       | OTU deubiquitinase 7B                                            | -5.06 | 0.02 |
| 319 | <b>UEVLD</b>        | UEV and lactate/malate dehydrogenase domains                     | -5.05 | 0.02 |
| 320 | <b>LACRT</b>        | lacritin                                                         | -5.04 | 0.02 |
| 321 | <b>ARHGAP5-AS1</b>  | ARHGAP5 antisense RNA 1 (head to head)                           | -5.03 | 0.02 |
| 322 | <b>ZNF75A</b>       | zinc finger protein 75a                                          | -5.02 | 0.02 |
| 323 | <b>ADAL</b>         | adenosine deaminase-like                                         | -5.00 | 0.02 |
| 324 | <b>NAA40</b>        | N(alpha)-acetyltransferase 40, NatD catalytic subunit            | -4.98 | 0.02 |
| 325 | <b>ANKRD34B</b>     | ankyrin repeat domain 34B                                        | -4.97 | 0.02 |

|     |              |                                                                     |       |      |
|-----|--------------|---------------------------------------------------------------------|-------|------|
| 326 | ATP6V1C2     | ATPase, H <sup>+</sup> transporting, lysosomal 42kDa, V1 subunit C2 | -4.97 | 0.02 |
| 327 | RSG1         | REM2 and RAB-like small GTPase 1                                    | -4.96 | 0.02 |
| 328 | HESX1        | HESX homeobox 1                                                     | -4.96 | 0.02 |
| 329 | LOC101928092 | uncharacterized LOC101928092                                        | -4.95 | 0.02 |
| 330 | TRAF3        | TNF receptor-associated factor 3                                    | -4.95 | 0.02 |
| 331 | lnc-PLA2G3-1 | lnc-PLA2G3-1:1                                                      | -4.94 | 0.02 |
| 332 | DTX4         | deltex 4, E3 ubiquitin ligase                                       | -4.93 | 0.02 |
| 333 | IKZF2        | IKAROS family zinc finger 2 (Helios)                                | -4.93 | 0.02 |
| 334 | CAPRIN2      | caprin family member 2                                              | -4.90 | 0.02 |
| 335 | PDE12        | phosphodiesterase 12                                                | -4.89 | 0.02 |
| 336 | DRC1         | dynein regulatory complex subunit 1                                 | -4.88 | 0.02 |
| 337 | FLCN         | folliculin                                                          | -4.87 | 0.02 |
| 338 | OSBP2        | oxysterol binding protein 2                                         | -4.84 | 0.02 |
| 339 | WNK2         | WNK lysine deficient protein kinase 2                               | -4.82 | 0.02 |
| 340 | GPR135       | G protein-coupled receptor 135                                      | -4.81 | 0.02 |
| 341 | ZNF221       | zinc finger protein 221                                             | -4.80 | 0.02 |
| 342 | KRT80        | keratin 80, type II                                                 | -4.78 | 0.02 |
| 343 | VPS13A       | vacuolar protein sorting 13 homolog A ( <i>S. cerevisiae</i> )      | -4.77 | 0.02 |
| 344 | ZNF366       | zinc finger protein 366                                             | -4.77 | 0.04 |
| 345 | C17orf100    | chromosome 17 open reading frame 100                                | -4.75 | 0.02 |
| 346 | VHLL         | von Hippel-Lindau tumor suppressor-like                             | -4.74 | 0.02 |
| 347 | RALGPS1      | Ral GEF with PH domain and SH3 binding motif 1                      | -4.72 | 0.02 |
| 348 | LMF1         | lipase maturation factor 1                                          | -4.71 | 0.02 |
| 349 | PDE12        | phosphodiesterase 12                                                | -4.71 | 0.02 |
| 350 | ZNF718       | zinc finger protein 718                                             | -4.69 | 0.02 |
| 351 | CLGN         | calmegin                                                            | -4.68 | 0.02 |
| 352 | ZNF443       | zinc finger protein 443                                             | -4.68 | 0.02 |
| 353 | ZNF530       | zinc finger protein 530                                             | -4.65 | 0.02 |
| 354 | FGF14-AS2    | FGF14 antisense RNA 2                                               | -4.64 | 0.02 |
| 355 | RAP2C-AS1    | RAP2C antisense RNA 1                                               | -4.64 | 0.02 |
| 356 | POTEI        | POTE ankyrin domain family, member I                                | -4.63 | 0.02 |
| 357 | CELF3        | CUGBP, Elav-like family member 3                                    | -4.62 | 0.02 |

|     |           |                                                                                   |       |      |
|-----|-----------|-----------------------------------------------------------------------------------|-------|------|
| 358 | HAS3      | hyaluronan synthase 3                                                             | -4.61 | 0.02 |
| 359 | SCLY      | selenocysteinylase                                                                | -4.60 | 0.02 |
| 360 | SMURF2    | SMAD specific E3 ubiquitin protein ligase 2                                       | -4.60 | 0.02 |
| 361 | CLCN2     | chloride channel, voltage-sensitive 2                                             | -4.53 | 0.02 |
| 362 | KIAA1804  | mixed lineage kinase 4                                                            | -4.50 | 0.02 |
| 363 | GPATCH2L  | G patch domain containing 2-like                                                  | -4.49 | 0.02 |
| 364 | SLC9A1    | solute carrier family 9, subfamily A (NHE1, cation proton antiporter 1), member 1 | -4.48 | 0.02 |
| 365 | RPS3      | ribosomal protein S3                                                              | -4.47 | 0.02 |
| 366 | ZNF561    | zinc finger protein 561                                                           | -4.45 | 0.02 |
| 367 | SSX2      | synovial sarcoma, X breakpoint 2                                                  | -4.44 | 0.02 |
| 368 | LINC00839 | long intergenic non-protein coding RNA 839                                        | -4.43 | 0.02 |
| 369 | THRAP3    | thyroid hormone receptor associated protein 3                                     | -4.43 | 0.02 |
| 370 | SPG11     | spastic paraplegia 11 (autosomal recessive)                                       | -4.38 | 0.02 |
| 371 | ZRANB1    | zinc finger, RAN-binding domain containing 1                                      | -4.38 | 0.02 |
| 372 | MEIG1     | meiosis/spermiogenesis associated 1                                               | -4.38 | 0.02 |
| 373 | MSANTD3   | Myb/SANT-like DNA-binding domain containing 3                                     | -4.37 | 0.02 |
| 374 | CSPP1     | centrosome and spindle pole associated protein 1                                  | -4.37 | 0.02 |
| 375 | SEC14L1   | SEC14-like 1 ( <i>S. cerevisiae</i> )                                             | -4.37 | 0.02 |
| 376 | BEND7     | BEN domain containing 7                                                           | -4.33 | 0.02 |
| 377 | PIP5K1P1  | phosphatidylinositol-4-phosphate 5-kinase, type I, pseudogene 1                   | -4.33 | 0.04 |
| 378 | DNAJC18   | DnaJ (Hsp40) homolog, subfamily C, member 18                                      | -4.32 | 0.02 |
| 379 | GPR27     | G protein-coupled receptor 27                                                     | -4.31 | 0.02 |
| 380 | FSIP1     | fibrous sheath interacting protein 1                                              | -4.31 | 0.02 |
| 381 | C11orf97  | chromosome 11 open reading frame 97                                               | -4.23 | 0.02 |
| 382 | HAGLROS   | HAGLR opposite strand (non-protein coding)                                        | -4.21 | 0.02 |
| 383 | CDK17     | cyclin-dependent kinase 17                                                        | -4.20 | 0.02 |

|     |               |                                                              |       |      |
|-----|---------------|--------------------------------------------------------------|-------|------|
| 384 | SLC35G1       | solute carrier family 35, member G1                          | -4.20 | 0.02 |
| 385 | CCDC173       | coiled-coil domain containing 173                            | -4.20 | 0.02 |
| 386 | KIRREL2       | kin of IRRE like 2 (Drosophila)                              | -4.18 | 0.02 |
| 387 | ND1           | NADH dehydrogenase, subunit 1 (complex I)                    | -4.18 | 0.04 |
| 388 | TMEM86A       | transmembrane protein 86A                                    | -4.16 | 0.02 |
| 389 | SNRPC         | small nuclear ribonucleoprotein polypeptide C                | -4.16 | 0.02 |
| 390 | HERC4         | HECT and RLD domain containing E3 ubiquitin protein ligase 4 | -4.15 | 0.02 |
| 391 | NUP43         | nucleoporin 43kDa                                            | -4.12 | 0.02 |
| 392 | ANXA11        | annexin A11                                                  | -4.10 | 0.02 |
| 393 | ZMAT3         | zinc finger, matrin-type 3                                   | -4.09 | 0.02 |
| 394 | ZNF501        | zinc finger protein 501                                      | -4.08 | 0.02 |
| 395 | SH3BGRL2      | SH3 domain binding glutamate-rich protein like 2             | -4.05 | 0.02 |
| 396 | LRRC42        | leucine rich repeat containing 42                            | -4.04 | 0.02 |
| 397 | lnc-TMEM109-1 | lnc-TMEM109-1:1                                              | -4.03 | 0.02 |
| 398 | ZNF69         | zinc finger protein 69                                       | -4.00 | 0.02 |
| 399 | SPATA24       | spermatogenesis associated 24                                | -3.97 | 0.02 |
| 400 | FZD5          | frizzled class receptor 5                                    | -3.97 | 0.02 |
| 401 | EXOGL         | endo/exonuclease (5'-3'), endonuclease G-like                | -3.97 | 0.02 |
| 402 | TXLNA         | taxilin alpha                                                | -3.96 | 0.02 |
| 403 | ZFP3          | ZFP3 zinc finger protein                                     | -3.94 | 0.02 |
| 404 | AHI1          | Abelson helper integration site 1                            | -3.94 | 0.02 |
| 405 | NEK9          | NIMA-related kinase 9                                        | -3.93 | 0.02 |
| 406 | PPEF1         | protein phosphatase, EF-hand calcium binding domain 1        | -3.93 | 0.02 |
| 407 | lnc-XRCC6-1   | lnc-XRCC6-1:1                                                | -3.93 | 0.02 |
| 408 | ZNF146        | zinc finger protein 146                                      | -3.92 | 0.02 |
| 409 | CD79B         | CD79b molecule, immunoglobulin-associated beta               | -3.91 | 0.02 |
| 410 | ZC3H12D       | zinc finger CCCH-type containing 12D                         | -3.89 | 0.02 |
| 411 | RABL2A        | RAB, member of RAS oncogene family-like 2A                   | -3.89 | 0.02 |



|     |             |                                                              |       |      |
|-----|-------------|--------------------------------------------------------------|-------|------|
| 412 | NAV2        | neuron navigator 2                                           | -3.87 | 0.02 |
| 413 | ACTR3B      | ARP3 actin-related protein 3 homolog B (yeast)               | -3.86 | 0.02 |
| 414 | DNAH9       | dynein, axonemal, heavy chain 9                              | -3.85 | 0.02 |
| 415 | USP38       | ubiquitin specific peptidase 38                              | -3.83 | 0.02 |
| 416 | ATP11A      | ATPase, class VI, type 11A                                   | -3.82 | 0.02 |
| 417 | TM7SF2      | transmembrane 7 superfamily member 2                         | -3.82 | 0.02 |
| 418 | SPATA5      | spermatogenesis associated 5                                 | -3.82 | 0.02 |
| 419 | ZCCHC18     | zinc finger, CCHC domain containing 18                       | -3.80 | 0.02 |
| 420 | RFPL1S      | RFPL1 antisense RNA 1                                        | -3.80 | 0.02 |
| 421 | lnc-CHD1L-1 | lnc-CHD1L-1:3                                                | -3.78 | 0.04 |
| 422 | C8orf31     | chromosome 8 open reading frame 31                           | -3.76 | 0.02 |
| 423 | TNRC6C      | trinucleotide repeat containing 6C                           | -3.75 | 0.02 |
| 424 | MFI2-AS1    | MFI2 antisense RNA 1                                         | -3.75 | 0.02 |
| 425 | COX11       | COX11 cytochrome c oxidase copper chaperone                  | -3.75 | 0.02 |
| 426 | OLAH        | oleoyl-ACP hydrolase                                         | -3.73 | 0.02 |
| 427 | ZNF682      | zinc finger protein 682                                      | -3.71 | 0.02 |
| 428 | SP4         | Sp4 transcription factor                                     | -3.70 | 0.02 |
| 429 | TLE6        | transducin-like enhancer of split 6                          | -3.70 | 0.02 |
| 430 | ZBTB41      | zinc finger and BTB domain containing 41                     | -3.70 | 0.02 |
| 431 | ERCC4       | excision repair cross-complementation group 4                | -3.68 | 0.02 |
| 432 | CCL26       | chemokine (C-C motif) ligand 26                              | -3.68 | 0.02 |
| 433 | GAS8        | growth arrest-specific 8                                     | -3.68 | 0.02 |
| 434 | ZNF2        | zinc finger protein 2                                        | -3.68 | 0.02 |
| 435 | ING3        | inhibitor of growth family, member 3                         | -3.67 | 0.02 |
| 436 | HERC2       | HECT and RLD domain containing E3 ubiquitin protein ligase 2 | -3.66 | 0.02 |
| 437 | GAS6        | growth arrest-specific 6                                     | -3.66 | 0.02 |
| 438 | LURAP1      | leucine rich adaptor protein 1                               | -3.65 | 0.02 |
| 439 | SENP8       | SUMO/sentrin specific peptidase family member 8              | -3.63 | 0.02 |
| 440 | RPS2        | ribosomal protein S2                                         | -3.59 | 0.02 |
| 441 | DPY19L1P1   | DPY19L1 pseudogene 1                                         | -3.55 | 0.02 |
| 442 | CCDC57      | coiled-coil domain containing 57                             | -3.55 | 0.02 |

|     |              |                                                              |       |      |
|-----|--------------|--------------------------------------------------------------|-------|------|
| 443 | CRHBP        | corticotropin releasing hormone binding protein              | -3.55 | 0.02 |
| 444 | ZSCAN30      | zinc finger and SCAN domain containing 30                    | -3.54 | 0.02 |
| 445 | ZNF664       | zinc finger protein 664                                      | -3.53 | 0.02 |
| 446 | DTWD2        | DTW domain containing 2                                      | -3.51 | 0.02 |
| 447 | WDR19        | WD repeat domain 19                                          | -3.51 | 0.02 |
| 448 | C9orf9       | chromosome 9 open reading frame 9                            | -3.49 | 0.02 |
| 449 | LOC101928068 | uncharacterized LOC101928068                                 | -3.48 | 0.02 |
| 450 | GOLGA8F      | golgin A8 family, member F                                   | -3.48 | 0.02 |
| 451 | CDCA3        | cell division cycle associated 3                             | -3.48 | 0.02 |
| 452 | AGAP1        | ArfGAP with GTPase domain, ankyrin repeat and PH domain 1    | -3.46 | 0.02 |
| 453 | OPTC         | opticin                                                      | -3.46 | 0.02 |
| 454 | FNDC3A       | fibronectin type III domain containing 3A                    | -3.45 | 0.02 |
| 455 | SFTPA2       | surfactant protein A2                                        | -3.41 | 0.02 |
| 456 | SETD8        | SET domain containing (lysine methyltransferase) 8           | -3.38 | 0.02 |
| 457 | RSU1         | Ras suppressor protein 1                                     | -3.38 | 0.04 |
| 458 | MAGED4B      | melanoma antigen family D, 4B                                | -3.37 | 0.02 |
| 459 | SCAND2P      | SCAN domain containing 2 pseudogene                          | -3.34 | 0.02 |
| 460 | ZNF841       | zinc finger protein 841                                      | -3.32 | 0.02 |
| 461 | FLJ32255     | uncharacterized LOC643977                                    | -3.30 | 0.04 |
| 462 | LOC200726    | hCG1657980                                                   | -3.30 | 0.02 |
| 463 | CCND2        | cyclin D2                                                    | -3.28 | 0.02 |
| 464 | TCEAL7       | transcription elongation factor A (SII)-like 7               | -3.28 | 0.02 |
| 465 | TMEM144      | transmembrane protein 144                                    | -3.27 | 0.02 |
| 466 | NAPEPLD      | N-acyl phosphatidylethanolamine phospholipase D              | -3.27 | 0.02 |
| 467 | SESN3        | sestrin 3                                                    | -3.26 | 0.02 |
| 468 | TRAF3IP2     | TRAF3 interacting protein 2                                  | -3.24 | 0.02 |
| 469 | NGRN         | neugrin, neurite outgrowth associated                        | -3.24 | 0.02 |
| 470 | DBF4B        | DBF4 zinc finger B                                           | -3.23 | 0.02 |
| 471 | ANKRD9       | ankyrin repeat domain 9                                      | -3.22 | 0.02 |
| 472 | KCNJ9        | potassium channel, inwardly rectifying subfamily J, member 9 | -3.22 | 0.02 |

|     |              |                                                                                                     |       |      |
|-----|--------------|-----------------------------------------------------------------------------------------------------|-------|------|
| 473 | ANKAR        | ankyrin and armadillo repeat containing                                                             | -3.22 | 0.02 |
| 474 | ZNF16        | zinc finger protein 16                                                                              | -3.22 | 0.02 |
| 475 | LIG1         | ligase I, DNA, ATP-dependent                                                                        | -3.20 | 0.02 |
| 476 | lnc-NDFIP1-1 | lnc-NDFIP1-1:1                                                                                      | -3.19 | 0.02 |
| 477 | POC1A        | POC1 centriolar protein A                                                                           | -3.18 | 0.02 |
| 478 | PRG2         | proteoglycan 2, bone marrow (natural killer cell activator, eosinophil granule major basic protein) | -3.18 | 0.02 |
| 479 | NTF3         | neurotrophin 3                                                                                      | -3.18 | 0.04 |
| 480 | ZRANB3       | zinc finger, RAN-binding domain containing 3                                                        | -3.17 | 0.02 |
| 481 | ZNF345       | zinc finger protein 345                                                                             | -3.17 | 0.02 |
| 482 | PRKCI        | protein kinase C, iota                                                                              | -3.15 | 0.02 |
| 483 | MAK          | male germ cell-associated kinase                                                                    | -3.12 | 0.04 |
| 484 | STK3         | serine/threonine kinase 3                                                                           | -3.10 | 0.02 |
| 485 | C1orf115     | chromosome 1 open reading frame 115                                                                 | -3.08 | 0.02 |
| 486 | MPC2         | mitochondrial pyruvate carrier 2                                                                    | -3.00 | 0.02 |

(vi) Differentially expressed genes between Control Never smokers and COPD Ex-smokers having FC>3 and p value<0.05

| S.No | GeneSymbol | GeneName                                                                                       | FC      | p value |
|------|------------|------------------------------------------------------------------------------------------------|---------|---------|
| 1    | CLPS       | colipase, pancreatic                                                                           | -109.36 | 0.04    |
| 2    | SLC6A14    | solute carrier family 6 (amino acid transporter), member 14                                    | 59.44   | 0.02    |
| 3    | MAGI2-AS3  | MAGI2 antisense RNA 3                                                                          | 48.33   | 0.02    |
| 4    | MLLT4      | myeloid/lymphoid or mixed-lineage leukemia (trithorax homolog, Drosophila); translocated to, 4 | 47.77   | 0.02    |
| 5    | PHLPP1     | PH domain and leucine rich repeat protein phosphatase 1                                        | 45.32   | 0.02    |
| 6    | MID1       | midline 1                                                                                      | 43.71   | 0.02    |
| 7    | VLDLR      | very low density lipoprotein receptor                                                          | 43.17   | 0.02    |
| 8    | PCDHB10    | protocadherin beta 10                                                                          | 42.84   | 0.02    |
| 9    | ZNF229     | zinc finger protein 229                                                                        | 42.27   | 0.02    |
| 10   | CCDC68     | coiled-coil domain containing 68                                                               | 41.64   | 0.02    |

|    |                     |                                                                       |              |             |
|----|---------------------|-----------------------------------------------------------------------|--------------|-------------|
| 11 | <b>SFRP2</b>        | <b>secreted frizzled-related protein 2</b>                            | <b>40.88</b> | <b>0.02</b> |
| 12 | <b>LCE1B</b>        | <b>late cornified envelope 1B</b>                                     | <b>40.77</b> | <b>0.02</b> |
| 13 | <b>CERS3</b>        | <b>ceramide synthase 3</b>                                            | <b>39.82</b> | <b>0.02</b> |
| 14 | <b>TUBB2B</b>       | <b>tubulin, beta 2B class IIb</b>                                     | <b>38.66</b> | <b>0.02</b> |
| 15 | <b>PLN</b>          | <b>phospholamban</b>                                                  | <b>37.53</b> | <b>0.02</b> |
| 16 | <b>AASDH</b>        | <b>aminoadipate-semialdehyde dehydrogenase</b>                        | <b>37.48</b> | <b>0.02</b> |
| 17 | <b>TEKT1</b>        | <b>tektin 1</b>                                                       | <b>37.01</b> | <b>0.02</b> |
| 18 | <b>lnc-DR1-1</b>    | <b>lnc-DR1-1:1</b>                                                    | <b>36.10</b> | <b>0.02</b> |
| 19 | <b>PNPO</b>         | <b>pyridoxamine 5'-phosphate oxidase</b>                              | <b>35.45</b> | <b>0.02</b> |
| 20 | <b>IQCH</b>         | <b>IQ motif containing H</b>                                          | <b>35.03</b> | <b>0.02</b> |
| 21 | <b>LOC286071</b>    | <b>uncharacterized LOC286071</b>                                      | <b>34.86</b> | <b>0.02</b> |
| 22 | <b>LOC101929683</b> | <b>uncharacterized LOC101929683</b>                                   | <b>34.79</b> | <b>0.02</b> |
| 23 | <b>SPO11</b>        | <b>SPO11 meiotic protein covalently bound to DSB</b>                  | <b>33.86</b> | <b>0.02</b> |
| 24 | <b>RGS17</b>        | <b>regulator of G-protein signaling 17</b>                            | <b>33.23</b> | <b>0.02</b> |
| 25 | <b>ADARB1</b>       | <b>adenosine deaminase, RNA-specific, B1</b>                          | <b>32.90</b> | <b>0.02</b> |
| 26 | <b>AVPR1A</b>       | <b>arginine vasopressin receptor 1A</b>                               | <b>32.47</b> | <b>0.02</b> |
| 27 | <b>TNFRSF19</b>     | <b>tumor necrosis factor receptor superfamily, member 19</b>          | <b>31.66</b> | <b>0.02</b> |
| 28 | <b>NKAIN3</b>       | <b>Na<sup>+</sup>/K<sup>+</sup> transporting ATPase interacting 3</b> | <b>31.55</b> | <b>0.02</b> |
| 29 | <b>FAM53B-AS1</b>   | <b>FAM53B antisense RNA 1</b>                                         | <b>31.50</b> | <b>0.02</b> |
| 30 | <b>LINC01192</b>    | <b>long intergenic non-protein coding RNA 1192</b>                    | <b>31.07</b> | <b>0.02</b> |
| 31 | <b>C1QL3</b>        | <b>complement component 1, q subcomponent-like 3</b>                  | <b>30.94</b> | <b>0.02</b> |
| 32 | <b>SLITRK5</b>      | <b>SLIT and NTRK-like family, member 5</b>                            | <b>30.76</b> | <b>0.02</b> |
| 33 | <b>FAM13A</b>       | <b>family with sequence similarity 13, member A</b>                   | <b>30.74</b> | <b>0.02</b> |
| 34 | <b>CARD14</b>       | <b>caspase recruitment domain family, member 14</b>                   | <b>30.24</b> | <b>0.02</b> |
| 35 | <b>lnc-AKR1C3-1</b> | <b>lnc-AKR1C3-1:1</b>                                                 | <b>29.99</b> | <b>0.02</b> |
| 36 | <b>DYNC2H1</b>      | <b>dynein, cytoplasmic 2, heavy chain 1</b>                           | <b>29.69</b> | <b>0.02</b> |
| 37 | <b>KLHL29</b>       | <b>kelch-like family member 29</b>                                    | <b>29.55</b> | <b>0.02</b> |
| 38 | <b>RHAG</b>         | <b>Rh-associated glycoprotein</b>                                     | <b>29.22</b> | <b>0.02</b> |
| 39 | <b>lnc-ESR2-1</b>   | <b>lnc-ESR2-1:1</b>                                                   | <b>28.64</b> | <b>0.02</b> |
| 40 | <b>LOC642620</b>    | <b>uncharacterized LOC642620</b>                                      | <b>28.33</b> | <b>0.02</b> |
| 41 | <b>TP53BP1</b>      | <b>tumor protein p53 binding protein 1</b>                            | <b>28.26</b> | <b>0.02</b> |

|    |              |                                                                                                                                             |       |      |
|----|--------------|---------------------------------------------------------------------------------------------------------------------------------------------|-------|------|
| 42 | FLRT2        | fibronectin leucine rich transmembrane protein 2                                                                                            | 27.88 | 0.02 |
| 43 | SLC26A7      | solute carrier family 26 (anion exchanger), member 7                                                                                        | 27.86 | 0.02 |
| 44 | SALL1        | spalt-like transcription factor 1                                                                                                           | 27.78 | 0.02 |
| 45 | AQP11        | aquaporin 11                                                                                                                                | 27.76 | 0.02 |
| 46 | LOC101929475 | uncharacterized LOC101929475                                                                                                                | 27.62 | 0.02 |
| 47 | CCDC144A     | coiled-coil domain containing 144A                                                                                                          | 27.59 | 0.02 |
| 48 | GFM1         | G elongation factor, mitochondrial 1                                                                                                        | 27.46 | 0.02 |
| 49 | AFF2         | AF4/FMR2 family, member 2                                                                                                                   | 27.45 | 0.02 |
| 50 | MIR1245A     | microRNA 1245a                                                                                                                              | 27.04 | 0.02 |
| 51 | SEMA5A       | sema domain, seven thrombospondin repeats (type 1 and type 1-like), transmembrane domain (TM) and short cytoplasmic domain, (semaphorin) 5A | 26.60 | 0.02 |
| 52 | LYPD1        | LY6/PLAUR domain containing 1                                                                                                               | 26.58 | 0.02 |
| 53 | MAGEB3       | melanoma antigen family B, 3                                                                                                                | 26.50 | 0.02 |
| 54 | LINC00656    | long intergenic non-protein coding RNA 656                                                                                                  | 26.06 | 0.02 |
| 55 | LINC00403    | long intergenic non-protein coding RNA 403                                                                                                  | 25.92 | 0.02 |
| 56 | C17orf104    | chromosome 17 open reading frame 104                                                                                                        | 25.63 | 0.02 |
| 57 | SEMA3E       | sema domain, immunoglobulin domain (Ig), short basic domain, secreted, (semaphorin) 3E                                                      | 25.57 | 0.02 |
| 58 | COLCA2       | colorectal cancer associated 2                                                                                                              | 25.41 | 0.02 |
| 59 | CDH6         | cadherin 6, type 2, K-cadherin (fetal kidney)                                                                                               | 25.35 | 0.02 |
| 60 | CRISP3       | cysteine-rich secretory protein 3                                                                                                           | 25.09 | 0.02 |
| 61 | PCDHGA5      | protocadherin gamma subfamily A, 5                                                                                                          | 25.00 | 0.02 |
| 62 | SLC5A7       | solute carrier family 5 (sodium/choline cotransporter), member 7                                                                            | 24.96 | 0.02 |
| 63 | NOX4         | NADPH oxidase 4                                                                                                                             | 24.80 | 0.02 |
| 64 | GBP7         | guanylate binding protein 7                                                                                                                 | 24.68 | 0.02 |
| 65 | CCM2L        | cerebral cavernous malformation 2-like                                                                                                      | 24.58 | 0.02 |

|    |              |                                                                        |        |      |
|----|--------------|------------------------------------------------------------------------|--------|------|
| 66 | CAPN11       | calpain 11                                                             | 24.57  | 0.02 |
| 67 | AMOT         | angiomotin                                                             | 24.51  | 0.02 |
| 68 | AGXT         | alanine-glyoxylate<br>aminotransferase                                 | 24.51  | 0.02 |
| 69 | ZNF646       | zinc finger protein 646                                                | -24.42 | 0.04 |
| 70 | lnc-SNURF-3  | lnc-SNURF-3:21                                                         | 24.13  | 0.02 |
| 71 | NDC80        | NDC80 kinetochore complex<br>component                                 | 23.99  | 0.02 |
| 72 | CYP4X1       | cytochrome P450, family 4,<br>subfamily X, polypeptide 1               | 23.95  | 0.02 |
| 73 | FAM149B1     | family with sequence<br>similarity 149, member B1                      | 23.83  | 0.02 |
| 74 | ATF7         | activating transcription factor<br>7                                   | 23.81  | 0.02 |
| 75 | HMMR-AS1     | HMMR antisense RNA 1                                                   | 23.61  | 0.02 |
| 76 | IL22RA1      | interleukin 22 receptor, alpha<br>1                                    | 23.57  | 0.02 |
| 77 | WDR72        | WD repeat domain 72                                                    | 23.39  | 0.02 |
| 78 | WFDC10A      | WAP four-disulfide core<br>domain 10A                                  | 23.20  | 0.02 |
| 79 | IFNA8        | interferon, alpha 8                                                    | 23.04  | 0.02 |
| 80 | STEAP1       | six transmembrane epithelial<br>antigen of the prostate 1              | 22.98  | 0.02 |
| 81 | LOC101928036 | uncharacterized<br>LOC101928036                                        | 22.76  | 0.02 |
| 82 | BHMT2        | betaine--homocysteine S-<br>methyltransferase 2                        | 22.67  | 0.02 |
| 83 | ZIC2         | Zic family member 2                                                    | 22.64  | 0.02 |
| 84 | FBLIM1       | filamin binding LIM protein 1                                          | 22.59  | 0.02 |
| 85 | RSPO2        | R-spondin 2                                                            | 22.43  | 0.02 |
| 86 | C2orf80      | chromosome 2 open reading<br>frame 80                                  | 22.42  | 0.02 |
| 87 | DPP10        | dipeptidyl-peptidase 10 (non-<br>functional)                           | 22.37  | 0.02 |
| 88 | LUM          | lumican                                                                | 22.27  | 0.02 |
| 89 | SLC6A3       | solute carrier family 6<br>(neurotransmitter<br>transporter), member 3 | 21.92  | 0.02 |
| 90 | SPDYA        | speedy/RINGO cell cycle<br>regulator family member A                   | 21.90  | 0.02 |
| 91 | ATP13A4      | ATPase type 13A4                                                       | 21.87  | 0.02 |
| 92 | APBB2        | amyloid beta (A4) precursor<br>protein-binding, family B,<br>member 2  | 21.56  | 0.02 |
| 93 | LHX9         | LIM homeobox 9                                                         | 21.55  | 0.02 |
| 94 | DCC          | DCC netrin 1 receptor                                                  | 21.50  | 0.02 |
| 95 | DCAF12L1     | DDB1 and CUL4 associated<br>factor 12-like 1                           | 21.45  | 0.02 |

|     |                |                                                                                  |       |      |
|-----|----------------|----------------------------------------------------------------------------------|-------|------|
| 96  | lnc-PDE4D-1    | lnc-PDE4D-1:1                                                                    | 21.43 | 0.02 |
| 97  | SCAMPER        | sphingolipid Ca <sup>2+</sup> release mediating protein of endoplasmic reticulum | 21.42 | 0.02 |
| 98  | MLPH           | melanophilin                                                                     | 21.42 | 0.02 |
| 99  | DUSP21         | dual specificity phosphatase 21                                                  | 21.41 | 0.02 |
| 100 | INSM1          | insulinoma-associated 1                                                          | 21.39 | 0.02 |
| 101 | ZFP28          | ZFP28 zinc finger protein                                                        | 21.33 | 0.02 |
| 102 | MYH7B          | myosin, heavy chain 7B, cardiac muscle, beta                                     | 21.29 | 0.02 |
| 103 | LHX6           | LIM homeobox 6                                                                   | 21.28 | 0.02 |
| 104 | COL6A3         | collagen, type VI, alpha 3                                                       | 21.22 | 0.02 |
| 105 | XKR6           | XK, Kell blood group complex subunit-related family, member 6                    | 21.21 | 0.02 |
| 106 | DPY19L2        | dpy-19-like 2 ( <i>C. elegans</i> )                                              | 21.19 | 0.02 |
| 107 | GRM1           | glutamate receptor, metabotropic 1                                               | 21.19 | 0.02 |
| 108 | BRIP1          | BRCA1 interacting protein C-terminal helicase 1                                  | 21.15 | 0.02 |
| 109 | lnc-FZD4-1     | lnc-FZD4-1:2                                                                     | 21.12 | 0.02 |
| 110 | ADAMTSL1       | ADAMTS-like 1                                                                    | 21.09 | 0.02 |
| 111 | DLGAP1         | discs, large ( <i>Drosophila</i> ) homolog-associated protein 1                  | 21.08 | 0.02 |
| 112 | TRAF3IP2       | TRAF3 interacting protein 2                                                      | 21.08 | 0.02 |
| 113 | GJD4           | gap junction protein, delta 4, 40.1kDa                                           | 21.07 | 0.02 |
| 114 | LRRIQ1         | leucine-rich repeats and IQ motif containing 1                                   | 21.04 | 0.02 |
| 115 | CADM2          | cell adhesion molecule 2                                                         | 21.00 | 0.02 |
| 116 | NCAM2          | neural cell adhesion molecule 2                                                  | 20.98 | 0.02 |
| 117 | lnc-GFAP-1     | lnc-GFAP-1:1                                                                     | 20.97 | 0.02 |
| 118 | CNTFR          | ciliary neurotrophic factor receptor                                             | 20.96 | 0.02 |
| 119 | C15orf56       | chromosome 15 open reading frame 56                                              | 20.94 | 0.02 |
| 120 | ANKRD62        | ankyrin repeat domain 62                                                         | 20.88 | 0.02 |
| 121 | LRRC55         | leucine rich repeat containing 55                                                | 20.87 | 0.02 |
| 122 | UTS2B          | urotensin 2B                                                                     | 20.82 | 0.02 |
| 123 | MMP20          | matrix metalloproteinase 20                                                      | 20.77 | 0.02 |
| 124 | TIE1           | tyrosine kinase with immunoglobulin-like and EGF-like domains 1                  | 20.75 | 0.02 |
| 125 | lnc-FAM189A1-3 | lnc-FAM189A1-3:1                                                                 | 20.74 | 0.02 |

|     |                     |                                                                 |              |             |
|-----|---------------------|-----------------------------------------------------------------|--------------|-------------|
| 126 | <b>RBMY1E</b>       | <b>RNA binding motif protein, Y-linked, family 1, member E</b>  | <b>20.72</b> | <b>0.02</b> |
| 127 | <b>ANGPT1</b>       | <b>angiopoietin 1</b>                                           | <b>20.71</b> | <b>0.02</b> |
| 128 | <b>PCDHB2</b>       | <b>protocadherin beta 2</b>                                     | <b>20.70</b> | <b>0.02</b> |
| 129 | <b>SPERT</b>        | <b>spermatid associated</b>                                     | <b>20.68</b> | <b>0.02</b> |
| 130 | <b>SALL3</b>        | <b>spalt-like transcription factor 3</b>                        | <b>20.49</b> | <b>0.02</b> |
| 131 | <b>ZNF471</b>       | <b>zinc finger protein 471</b>                                  | <b>20.47</b> | <b>0.02</b> |
| 132 | <b>FAM47E</b>       | <b>family with sequence similarity 47, member E</b>             | <b>20.46</b> | <b>0.02</b> |
| 133 | <b>NR0B1</b>        | <b>nuclear receptor subfamily 0, group B, member 1</b>          | <b>20.45</b> | <b>0.02</b> |
| 134 | <b>LOC100996573</b> | <b>uncharacterized LOC100996573</b>                             | <b>20.42</b> | <b>0.02</b> |
| 135 | <b>GABRG2</b>       | <b>gamma-aminobutyric acid (GABA) A receptor, gamma 2</b>       | <b>20.42</b> | <b>0.02</b> |
| 136 | <b>GRIK2</b>        | <b>glutamate receptor, ionotropic, kainate 2</b>                | <b>20.38</b> | <b>0.02</b> |
| 137 | <b>ZNF682</b>       | <b>zinc finger protein 682</b>                                  | <b>20.34</b> | <b>0.02</b> |
| 138 | <b>DNAH14</b>       | <b>dynein, axonemal, heavy chain 14</b>                         | <b>20.34</b> | <b>0.02</b> |
| 139 | <b>SYNE1</b>        | <b>spectrin repeat containing, nuclear envelope 1</b>           | <b>20.28</b> | <b>0.02</b> |
| 140 | <b>DKK3</b>         | <b>dickkopf WNT signaling pathway inhibitor 3</b>               | <b>20.24</b> | <b>0.02</b> |
| 141 | <b>SLC10A7</b>      | <b>solute carrier family 10, member 7</b>                       | <b>20.18</b> | <b>0.02</b> |
| 142 | <b>MBTPS2</b>       | <b>membrane-bound transcription factor peptidase, site 2</b>    | <b>20.17</b> | <b>0.02</b> |
| 143 | <b>CCDC113</b>      | <b>coiled-coil domain containing 113</b>                        | <b>20.12</b> | <b>0.02</b> |
| 144 | <b>LRP2BP</b>       | <b>LRP2 binding protein</b>                                     | <b>20.04</b> | <b>0.02</b> |
| 145 | <b>LINC00615</b>    | <b>long intergenic non-protein coding RNA 615</b>               | <b>20.01</b> | <b>0.02</b> |
| 146 | <b>PVRL3</b>        | <b>poliovirus receptor-related 3</b>                            | <b>19.99</b> | <b>0.02</b> |
| 147 | <b>SFXN1</b>        | <b>sideroflexin 1</b>                                           | <b>19.93</b> | <b>0.02</b> |
| 148 | <b>SRGAP3</b>       | <b>SLIT-ROBO Rho GTPase activating protein 3</b>                | <b>19.86</b> | <b>0.02</b> |
| 149 | <b>LOC100131864</b> | <b>uncharacterized LOC100131864</b>                             | <b>19.85</b> | <b>0.02</b> |
| 150 | <b>PRKAA2</b>       | <b>protein kinase, AMP-activated, alpha 2 catalytic subunit</b> | <b>19.76</b> | <b>0.02</b> |
| 151 | <b>MARK4</b>        | <b>MAP/microtubule affinity-regulating kinase 4</b>             | <b>19.76</b> | <b>0.02</b> |



|     |               |                                                                          |       |      |
|-----|---------------|--------------------------------------------------------------------------|-------|------|
| 152 | SLC13A1       | solute carrier family 13 (sodium/sulfate symporter), member 1            | 19.72 | 0.02 |
| 153 | FOXP2         | forkhead box P2                                                          | 19.67 | 0.02 |
| 154 | BMP7          | bone morphogenetic protein 7                                             | 19.60 | 0.02 |
| 155 | PDP2          | pyruvate dehydrogenase phosphatase catalytic subunit 2                   | 19.00 | 0.02 |
| 156 | ECM2          | extracellular matrix protein 2, female organ and adipocyte specific      | 18.98 | 0.02 |
| 157 | LOC101928794  | uncharacterized LOC101928794                                             | 18.88 | 0.02 |
| 158 | KLHL1         | kelch-like family member 1                                               | 18.83 | 0.02 |
| 159 | GLP1R         | glucagon-like peptide 1 receptor                                         | 18.58 | 0.02 |
| 160 | PCDHGB6       | protocadherin gamma subfamily B, 6                                       | 18.36 | 0.02 |
| 161 | COL19A1       | collagen, type XIX, alpha 1                                              | 18.30 | 0.02 |
| 162 | KRT12         | keratin 12, type I                                                       | 18.22 | 0.02 |
| 163 | FRMD3         | FERM domain containing 3                                                 | 18.19 | 0.02 |
| 164 | TMEM257       | transmembrane protein 257                                                | 18.15 | 0.02 |
| 165 | DMD           | dystrophin                                                               | 18.14 | 0.02 |
| 166 | CTGF          | connective tissue growth factor                                          | 18.00 | 0.02 |
| 167 | PGAP1         | post-GPI attachment to proteins 1                                        | 17.89 | 0.02 |
| 168 | ATP1B4        | ATPase, Na <sup>+</sup> /K <sup>+</sup> transporting, beta 4 polypeptide | 17.80 | 0.02 |
| 169 | SPAG16        | sperm associated antigen 16                                              | 17.78 | 0.02 |
| 170 | CBLN1         | cerebellin 1 precursor                                                   | 17.54 | 0.02 |
| 171 | ACSS3         | acyl-CoA synthetase short-chain family member 3                          | 17.43 | 0.02 |
| 172 | GARNL3        | GTPase activating Rap/RanGAP domain-like 3                               | 17.10 | 0.02 |
| 173 | DIRAS3        | DIRAS family, GTP-binding RAS-like 3                                     | 17.04 | 0.02 |
| 174 | WDR62         | WD repeat domain 62                                                      | 16.75 | 0.02 |
| 175 | HOGA1         | 4-hydroxy-2-oxoglutarate aldolase 1                                      | 16.69 | 0.02 |
| 176 | TRIM60        | tripartite motif containing 60                                           | 15.88 | 0.02 |
| 177 | lnc-C3orf65-1 | lnc-C3orf65-1:1                                                          | 15.82 | 0.02 |
| 178 | SLC30A8       | solute carrier family 30 (zinc transporter), member 8                    | 14.81 | 0.04 |
| 179 | THSD7A        | thrombospondin, type I, domain containing 7A                             | 14.69 | 0.02 |
| 180 | TXNL1         | thioredoxin-like 1                                                       | 14.38 | 0.02 |

|     |                    |                                                                                          |               |             |
|-----|--------------------|------------------------------------------------------------------------------------------|---------------|-------------|
| 181 | <b>TMEM30B</b>     | <b>transmembrane protein 30B</b>                                                         | <b>-14.27</b> | <b>0.04</b> |
| 182 | <b>PRDM9</b>       | <b>PR domain containing 9</b>                                                            | <b>14.10</b>  | <b>0.02</b> |
| 183 | <b>RGS4</b>        | <b>regulator of G-protein signaling 4</b>                                                | <b>14.03</b>  | <b>0.02</b> |
| 184 | <b>CCP110</b>      | <b>centriolar coiled coil protein 110kDa</b>                                             | <b>13.86</b>  | <b>0.02</b> |
| 185 | <b>VSTM2L</b>      | <b>V-set and transmembrane domain containing 2 like</b>                                  | <b>13.79</b>  | <b>0.02</b> |
| 186 | <b>BRCA2</b>       | <b>breast cancer 2, early onset</b>                                                      | <b>13.65</b>  | <b>0.02</b> |
| 187 | <b>PTPRZ1</b>      | <b>protein tyrosine phosphatase, receptor-type, Z polypeptide 1</b>                      | <b>13.50</b>  | <b>0.02</b> |
| 188 | <b>ACACA</b>       | <b>acetyl-CoA carboxylase alpha</b>                                                      | <b>13.22</b>  | <b>0.02</b> |
| 189 | <b>CDH26</b>       | <b>cadherin 26</b>                                                                       | <b>13.17</b>  | <b>0.02</b> |
| 190 | <b>TTY12</b>       | <b>testis-specific transcript, Y-linked 12 (non-protein coding)</b>                      | <b>13.14</b>  | <b>0.02</b> |
| 191 | <b>FMNL3</b>       | <b>formin-like 3</b>                                                                     | <b>13.01</b>  | <b>0.02</b> |
| 192 | <b>PHC3</b>        | <b>polyhomeotic homolog 3 (Drosophila)</b>                                               | <b>12.63</b>  | <b>0.02</b> |
| 193 | <b>lnc-OTX2-3</b>  | <b>lnc-OTX2-3:1</b>                                                                      | <b>12.45</b>  | <b>0.04</b> |
| 194 | <b>CASC5</b>       | <b>cancer susceptibility candidate 5</b>                                                 | <b>12.40</b>  | <b>0.02</b> |
| 195 | <b>C5orf66-AS2</b> | <b>C5orf66 antisense RNA 2</b>                                                           | <b>12.39</b>  | <b>0.02</b> |
| 196 | <b>lnc-FAS-1</b>   | <b>lnc-FAS-1:1</b>                                                                       | <b>12.32</b>  | <b>0.02</b> |
| 197 | <b>C8orf34</b>     | <b>chromosome 8 open reading frame 34</b>                                                | <b>12.31</b>  | <b>0.04</b> |
| 198 | <b>PIANP</b>       | <b>PILR alpha associated neural protein</b>                                              | <b>12.11</b>  | <b>0.02</b> |
| 199 | <b>NMNAT2</b>      | <b>nicotinamide nucleotide adenyltransferase 2</b>                                       | <b>12.08</b>  | <b>0.02</b> |
| 200 | <b>UACA</b>        | <b>uveal autoantigen with coiled-coil domains and ankyrin repeats</b>                    | <b>11.89</b>  | <b>0.02</b> |
| 201 | <b>CASC10</b>      | <b>cancer susceptibility candidate 10</b>                                                | <b>11.57</b>  | <b>0.02</b> |
| 202 | <b>SPARC</b>       | <b>secreted protein, acidic, cysteine-rich (osteonectin)</b>                             | <b>11.46</b>  | <b>0.02</b> |
| 203 | <b>THOC5</b>       | <b>THO complex 5</b>                                                                     | <b>11.33</b>  | <b>0.02</b> |
| 204 | <b>FHAD1</b>       | <b>forkhead-associated (FHA) phosphopeptide binding domain 1</b>                         | <b>11.05</b>  | <b>0.04</b> |
| 205 | <b>TPD52</b>       | <b>tumor protein D52</b>                                                                 | <b>11.04</b>  | <b>0.02</b> |
| 206 | <b>ZNF383</b>      | <b>zinc finger protein 383</b>                                                           | <b>10.88</b>  | <b>0.02</b> |
| 207 | <b>IL4</b>         | <b>interleukin 4</b>                                                                     | <b>10.73</b>  | <b>0.02</b> |
| 208 | <b>SLC9B1</b>      | <b>solute carrier family 9, subfamily B (NHA1, cation proton antiporter 1), member 1</b> | <b>10.44</b>  | <b>0.02</b> |

|     |              |                                                                       |       |      |
|-----|--------------|-----------------------------------------------------------------------|-------|------|
| 209 | KIT          | v-kit Hardy-Zuckerman 4 feline sarcoma viral oncogene homolog         | 10.41 | 0.02 |
| 210 | ZFP2         | ZFP2 zinc finger protein                                              | 10.39 | 0.02 |
| 211 | SLC25A5-AS1  | SLC25A5 antisense RNA 1                                               | 10.38 | 0.02 |
| 212 | ZNF551       | zinc finger protein 551                                               | 10.28 | 0.02 |
| 213 | MARVELD3     | MARVEL domain containing 3                                            | 9.89  | 0.02 |
| 214 | LIPH         | lipase, member H                                                      | 9.89  | 0.02 |
| 215 | SLC35D1      | solute carrier family 35 (UDP-GlcA/UDP-GalNAc transporter), member D1 | 9.84  | 0.02 |
| 216 | ITPKC        | inositol-trisphosphate 3-kinase C                                     | -9.73 | 0.04 |
| 217 | ETV3L        | ets variant 3-like                                                    | 9.70  | 0.02 |
| 218 | CD276        | CD276 molecule                                                        | 9.65  | 0.02 |
| 219 | GLTSCR1      | glioma tumor suppressor candidate region gene 1                       | -9.64 | 0.02 |
| 220 | GLDN         | gliomedin                                                             | 9.54  | 0.02 |
| 221 | IFT57        | intraflagellar transport 57                                           | 9.51  | 0.02 |
| 222 | ZFYVE16      | zinc finger, FYVE domain containing 16                                | 9.48  | 0.02 |
| 223 | ZNF587B      | zinc finger protein 587B                                              | 9.43  | 0.02 |
| 224 | OTC          | ornithine carbamoyltransferase                                        | 9.40  | 0.04 |
| 225 | SPINK6       | serine peptidase inhibitor, Kazal type 6                              | 9.37  | 0.04 |
| 226 | lnc-GPR183-2 | lnc-GPR183-2:4                                                        | 9.28  | 0.02 |
| 227 | ULBP2        | UL16 binding protein 2                                                | 9.17  | 0.02 |
| 228 | PUS10        | pseudouridylate synthase 10                                           | 8.99  | 0.02 |
| 229 | BRIP1        | BRCA1 interacting protein C-terminal helicase 1                       | 8.93  | 0.02 |
| 230 | NEK9         | NIMA-related kinase 9                                                 | 8.66  | 0.02 |
| 231 | PDE12        | phosphodiesterase 12                                                  | 8.57  | 0.02 |
| 232 | STAG3L4      | stromal antigen 3-like 4 (pseudogene)                                 | 8.48  | 0.02 |
| 233 | RIC3         | RIC3 acetylcholine receptor chaperone                                 | 8.38  | 0.02 |
| 234 | MYNN         | myoneurin                                                             | 8.36  | 0.02 |
| 235 | TRAF3IP2-AS1 | TRAF3IP2 antisense RNA 1                                              | 8.34  | 0.02 |
| 236 | CDK17        | cyclin-dependent kinase 17                                            | 8.32  | 0.02 |
| 237 | DPYS         | dihydropyrimidinase                                                   | 8.30  | 0.02 |
| 238 | ZNF251       | zinc finger protein 251                                               | 8.27  | 0.02 |
| 239 | ZNF366       | zinc finger protein 366                                               | 8.23  | 0.02 |
| 240 | MAPRE2       | microtubule-associated protein, RP/EB family, member 2                | 8.15  | 0.02 |

|     |              |                                                          |      |      |
|-----|--------------|----------------------------------------------------------|------|------|
| 241 | CAPN13       | calpain 13                                               | 8.05 | 0.02 |
| 242 | C9orf131     | chromosome 9 open reading frame 131                      | 7.97 | 0.02 |
| 243 | STON2        | stonin 2                                                 | 7.94 | 0.02 |
| 244 | FLJ44715     | uncharacterized LOC386671                                | 7.94 | 0.02 |
| 245 | TRIM17       | tripartite motif containing 17                           | 7.93 | 0.04 |
| 246 | STRBP        | spermatid perinuclear RNA binding protein                | 7.89 | 0.02 |
| 247 | HESX1        | HESX homeobox 1                                          | 7.86 | 0.02 |
| 248 | CLGN         | calmegin                                                 | 7.86 | 0.02 |
| 249 | RNF38        | ring finger protein 38                                   | 7.84 | 0.02 |
| 250 | PHF8         | PHD finger protein 8                                     | 7.84 | 0.02 |
| 251 | HNRNPM       | heterogeneous nuclear ribonucleoprotein M                | 7.83 | 0.02 |
| 252 | LOC101927482 | uncharacterized LOC101927482                             | 7.75 | 0.02 |
| 253 | lnc-PLA2G3-1 | lnc-PLA2G3-1:1                                           | 7.75 | 0.02 |
| 254 | ABCA10       | ATP-binding cassette, sub-family A (ABC1), member 10     | 7.74 | 0.02 |
| 255 | LOC100507277 | uncharacterized LOC100507277                             | 7.74 | 0.02 |
| 256 | CD79B        | CD79b molecule, immunoglobulin-associated beta           | 7.72 | 0.02 |
| 257 | LANCL2       | LanClantibioticsynthetase component C-like 2 (bacterial) | 7.71 | 0.02 |
| 258 | ENAH         | enabled homolog (Drosophila)                             | 7.70 | 0.02 |
| 259 | TRIM48       | tripartite motif containing 48                           | 7.70 | 0.02 |
| 260 | FGF14-AS2    | FGF14 antisense RNA 2                                    | 7.58 | 0.02 |
| 261 | INTS1        | integrator complex subunit 1                             | 7.58 | 0.04 |
| 262 | TNFRSF21     | tumor necrosis factor receptor superfamily, member 21    | 7.58 | 0.02 |
| 263 | FSIP1        | fibrous sheath interacting protein 1                     | 7.52 | 0.02 |
| 264 | PRAMEF19     | PRAME family member 19                                   | 7.48 | 0.02 |
| 265 | HDAC6        | histone deacetylase 6                                    | 7.47 | 0.02 |
| 266 | CALCR        | calcitonin receptor                                      | 7.46 | 0.02 |
| 267 | AVPR2        | arginine vasopressin receptor 2                          | 7.36 | 0.02 |
| 268 | FITM2        | fat storage-inducing transmembrane protein 2             | 7.34 | 0.02 |
| 269 | ARHGEF10     | Rho guanine nucleotide exchange factor (GEF) 10          | 7.33 | 0.02 |
| 270 | P2RY12       | purinergic receptor P2Y, G-protein coupled, 12           | 7.31 | 0.02 |
| 271 | CLCN2        | chloride channel, voltage-sensitive 2                    | 7.30 | 0.02 |

|     |           |                                                                       |       |      |
|-----|-----------|-----------------------------------------------------------------------|-------|------|
| 272 | NF2       | neurofibromin 2 (merlin)                                              | 7.28  | 0.02 |
| 273 | HAS3      | hyaluronan synthase 3                                                 | 7.21  | 0.02 |
| 274 | BRWD1-IT2 | BRWD1 intronic transcript 2 (non-protein coding)                      | 7.19  | 0.02 |
| 275 | KBTBD8    | kelch repeat and BTB (POZ) domain containing 8                        | 7.13  | 0.02 |
| 276 | LACRT     | lacritin                                                              | 7.12  | 0.02 |
| 277 | PLOD3     | procollagen-lysine, 2-oxoglutarate 5-dioxygenase 3                    | -7.07 | 0.04 |
| 278 | WNK2      | WNK lysine deficient protein kinase 2                                 | 7.06  | 0.02 |
| 279 | CDC25B    | cell division cycle 25B                                               | 6.97  | 0.02 |
| 280 | GAB1      | GRB2-associated binding protein 1                                     | 6.92  | 0.02 |
| 281 | VPS13A    | vacuolar protein sorting 13 homolog A ( <i>S. cerevisiae</i> )        | 6.91  | 0.02 |
| 282 | ZFP30     | ZFP30 zinc finger protein                                             | 6.88  | 0.04 |
| 283 | EOGT      | EGF domain-specific O-linked N-acetylglucosamine (GlcNAc) transferase | 6.85  | 0.02 |
| 284 | RPS3      | ribosomal protein S3                                                  | 6.78  | 0.02 |
| 285 | PRAMENP   | PRAME N-terminal-like, pseudogene                                     | 6.72  | 0.02 |
| 286 | ERMN      | ermin, ERM-like protein                                               | 6.71  | 0.02 |
| 287 | VHLL      | von Hippel-Lindau tumor suppressor-like                               | 6.65  | 0.02 |
| 288 | C1orf167  | chromosome 1 open reading frame 167                                   | 6.56  | 0.02 |
| 289 | CSPP1     | centrosome and spindle pole associated protein 1                      | 6.55  | 0.02 |
| 290 | C19orf80  | chromosome 19 open reading frame 80                                   | 6.43  | 0.02 |
| 291 | ZMAT3     | zinc finger, matrin-type 3                                            | 6.42  | 0.02 |
| 292 | LOC643406 | uncharacterized LOC643406                                             | 6.40  | 0.02 |
| 293 | DNAJC18   | DnaJ (Hsp40) homolog, subfamily C, member 18                          | 6.39  | 0.02 |
| 294 | SPATA24   | spermatogenesis associated 24                                         | 6.38  | 0.02 |
| 295 | AHI1      | Abelson helper integration site 1                                     | 6.35  | 0.02 |
| 296 | PGS1      | phosphatidylglycerophosphate synthase 1                               | 6.31  | 0.02 |
| 297 | SCN9A     | sodium channel, voltage gated, type IX alpha subunit                  | 6.27  | 0.02 |
| 298 | MFAP3     | microfibrillar-associated protein 3                                   | 6.25  | 0.02 |
| 299 | ABCA11P   | ATP-binding cassette, subfamily A (ABC1), member 11, pseudogene       | 6.21  | 0.02 |

|     |              |                                                           |      |      |
|-----|--------------|-----------------------------------------------------------|------|------|
| 300 | CUX1         | cut-like homeobox 1                                       | 6.20 | 0.02 |
| 301 | ZNF221       | zinc finger protein 221                                   | 6.18 | 0.02 |
| 302 | GPALPP1      | GPALPP motifs containing 1                                | 6.14 | 0.02 |
| 303 | PDE12        | phosphodiesterase 12                                      | 6.13 | 0.02 |
| 304 | RABL2A       | RAB, member of RAS oncogene family-like 2A                | 6.10 | 0.02 |
| 305 | TCTN1        | tectonic family member 1                                  | 6.06 | 0.02 |
| 306 | HCG9         | HLA complex group 9 (non-protein coding)                  | 5.99 | 0.04 |
| 307 | lnc-CHD1L-1  | lnc-CHD1L-1:3                                             | 5.96 | 0.02 |
| 308 | NAPEPLD      | N-acyl phosphatidylethanolamine phospholipase D           | 5.95 | 0.02 |
| 309 | ZRANB1       | zinc finger, RAN-binding domain containing 1              | 5.92 | 0.02 |
| 310 | SMURF2       | SMAD specific E3 ubiquitin protein ligase 2               | 5.92 | 0.02 |
| 311 | ZNF2         | zinc finger protein 2                                     | 5.91 | 0.02 |
| 312 | RNF157       | ring finger protein 157                                   | 5.90 | 0.02 |
| 313 | FAM106CP     | family with sequence similarity 106, member C, pseudogene | 5.86 | 0.02 |
| 314 | CAPRIN2      | caprin family member 2                                    | 5.85 | 0.02 |
| 315 | ASH1L        | ash1 (absent, small, or homeotic)-like (Drosophila)       | 5.85 | 0.02 |
| 316 | FBXO10       | F-box protein 10                                          | 5.75 | 0.02 |
| 317 | ATP11A       | ATPase, class VI, type 11A                                | 5.72 | 0.02 |
| 318 | ZSCAN2       | zinc finger and SCAN domain containing 2                  | 5.71 | 0.02 |
| 319 | lnc-ANTXRL-2 | lnc-ANTXRL-2:1                                            | 5.69 | 0.04 |
| 320 | IKZF2        | IKAROS family zinc finger 2 (Helios)                      | 5.67 | 0.02 |
| 321 | ORAOV1       | oral cancer overexpressed 1                               | 5.66 | 0.02 |
| 322 | GPATCH2L     | G patch domain containing 2-like                          | 5.66 | 0.02 |
| 323 | ND1          | NADH dehydrogenase, subunit 1 (complex I)                 | 5.66 | 0.02 |
| 324 | TRAF3IP2     | TRAF3 interacting protein 2                               | 5.62 | 0.02 |
| 325 | EXOGEN       | endo/exonuclease (5'-3'), endonuclease G-like             | 5.59 | 0.02 |
| 326 | KIRREL2      | kin of IRRE like 2 (Drosophila)                           | 5.58 | 0.02 |
| 327 | SNRPC        | small nuclear ribonucleoprotein polypeptide C             | 5.57 | 0.02 |
| 328 | DRC1         | dynein regulatory complex subunit 1                       | 5.56 | 0.04 |
| 329 | CD81         | CD81 molecule                                             | 5.56 | 0.02 |

|     |          |                                                                                             |      |      |
|-----|----------|---------------------------------------------------------------------------------------------|------|------|
| 330 | FAM27E2  | family with sequence similarity 27, member E2                                               | 5.54 | 0.02 |
| 331 | THRAP3   | thyroid hormone receptor associated protein 3                                               | 5.54 | 0.02 |
| 332 | TXLNA    | taxilin alpha                                                                               | 5.51 | 0.02 |
| 333 | SUN3     | Sad1 and UNC84 domain containing 3                                                          | 5.49 | 0.02 |
| 334 | ZNF69    | zinc finger protein 69                                                                      | 5.48 | 0.02 |
| 335 | MFI2-AS1 | MFI2 antisense RNA 1                                                                        | 5.41 | 0.02 |
| 336 | C1orf86  | chromosome 1 open reading frame 86                                                          | 5.40 | 0.02 |
| 337 | RBBP5    | retinoblastoma binding protein 5                                                            | 5.38 | 0.04 |
| 338 | PPP1CB   | protein phosphatase 1, catalytic subunit, beta isozyme                                      | 5.37 | 0.02 |
| 339 | HERC2    | HECT and RLD domain containing E3 ubiquitin protein ligase 2                                | 5.36 | 0.02 |
| 340 | GAS6     | growth arrest-specific 6                                                                    | 5.35 | 0.02 |
| 341 | MEIG1    | meiosis/spermiogenesis associated 1                                                         | 5.35 | 0.02 |
| 342 | ZNF530   | zinc finger protein 530                                                                     | 5.34 | 0.02 |
| 343 | DTX4     | deltex 4, E3 ubiquitin ligase                                                               | 5.34 | 0.02 |
| 344 | ZNF501   | zinc finger protein 501                                                                     | 5.33 | 0.02 |
| 345 | LPPR4    | lipid phosphate phosphatase-related protein type 4                                          | 5.32 | 0.04 |
| 346 | PLA2G10  | phospholipase A2, group X                                                                   | 5.30 | 0.02 |
| 347 | MCOLN2   | mucolipin 2                                                                                 | 5.29 | 0.02 |
| 348 | CCDC173  | coiled-coil domain containing 173                                                           | 5.27 | 0.02 |
| 349 | PLCB3    | phospholipase C, beta 3 (phosphatidylinositol-specific)                                     | 5.22 | 0.02 |
| 350 | HAGLROS  | HAGLR opposite strand (non-protein coding)                                                  | 5.21 | 0.02 |
| 351 | OLAH     | oleoyl-ACP hydrolase                                                                        | 5.17 | 0.04 |
| 352 | SETD8    | SET domain containing (lysine methyltransferase) 8                                          | 5.17 | 0.02 |
| 353 | NUP43    | nucleoporin 43kDa                                                                           | 5.16 | 0.02 |
| 354 | ASTN1    | astrotactin 1                                                                               | 5.13 | 0.02 |
| 355 | L3MBTL1  | l(3)mbt-like 1 (Drosophila)                                                                 | 5.10 | 0.02 |
| 356 | BBS7     | Bardet-Biedl syndrome 7                                                                     | 5.09 | 0.02 |
| 357 | COLEC11  | collectin sub-family member 11                                                              | 5.07 | 0.04 |
| 358 | COLQ     | collagen-like tail subunit (single strand of homotrimer) of asymmetric acetylcholinesterase | 5.07 | 0.02 |

|     |              |                                                                                   |      |      |
|-----|--------------|-----------------------------------------------------------------------------------|------|------|
| 359 | ATP6V1C2     | ATPase, H <sup>+</sup> transporting, lysosomal 42kDa, V1 subunit C2               | 5.07 | 0.02 |
| 360 | ZNF561       | zinc finger protein 561                                                           | 5.04 | 0.02 |
| 361 | ANXA11       | annexin A11                                                                       | 5.01 | 0.04 |
| 362 | GAS8         | growth arrest-specific 8                                                          | 4.99 | 0.02 |
| 363 | ZNF682       | zinc finger protein 682                                                           | 4.98 | 0.02 |
| 364 | ZNF76        | zinc finger protein 76                                                            | 4.96 | 0.02 |
| 365 | ALKBH5       | AlkB family member 5, RNA demethylase                                             | 4.94 | 0.02 |
| 366 | LURAP1       | leucine rich adaptor protein 1                                                    | 4.93 | 0.02 |
| 367 | MRAP         | melanocortin 2 receptor accessory protein                                         | 4.92 | 0.02 |
| 368 | LOC101928092 | uncharacterized LOC101928092                                                      | 4.89 | 0.02 |
| 369 | SLC9A1       | solute carrier family 9, subfamily A (NHE1, cation proton antiporter 1), member 1 | 4.86 | 0.02 |
| 370 | VPS13B       | vacuolar protein sorting 13 homolog B (yeast)                                     | 4.86 | 0.02 |
| 371 | MEPCE        | methylphosphate capping enzyme                                                    | 4.84 | 0.02 |
| 372 | COX11        | COX11 cytochrome c oxidase copper chaperone                                       | 4.83 | 0.02 |
| 373 | ZNF75A       | zinc finger protein 75a                                                           | 4.81 | 0.02 |
| 374 | ZNF443       | zinc finger protein 443                                                           | 4.79 | 0.02 |
| 375 | ZNF718       | zinc finger protein 718                                                           | 4.78 | 0.02 |
| 376 | MAK          | male germ cell-associated kinase                                                  | 4.76 | 0.02 |
| 377 | RALGPS1      | Ral GEF with PH domain and SH3 binding motif 1                                    | 4.75 | 0.02 |
| 378 | TM7SF2       | transmembrane 7 superfamily member 2                                              | 4.74 | 0.02 |
| 379 | NAV2         | neuron navigator 2                                                                | 4.74 | 0.04 |
| 380 | TRAF3        | TNF receptor-associated factor 3                                                  | 4.72 | 0.02 |
| 381 | TMEM86A      | transmembrane protein 86A                                                         | 4.70 | 0.02 |
| 382 | DLGAP5       | discs, large (Drosophila) homolog-associated protein 5                            | 4.69 | 0.02 |
| 383 | MED9         | mediator complex subunit 9                                                        | 4.65 | 0.02 |
| 384 | SH3BGRL2     | SH3 domain binding glutamate-rich protein like 2                                  | 4.64 | 0.02 |
| 385 | WDHD1        | WD repeat and HMG-box DNA binding protein 1                                       | 4.63 | 0.04 |
| 386 | FLJ32255     | uncharacterized LOC643977                                                         | 4.61 | 0.02 |
| 387 | PPEF1        | protein phosphatase, EF-hand calcium binding domain 1                             | 4.56 | 0.04 |



|     |              |                                                                                     |      |      |
|-----|--------------|-------------------------------------------------------------------------------------|------|------|
| 388 | POC1A        | POC1 centriolar protein A                                                           | 4.54 | 0.02 |
| 389 | TCHP         | trichoplein, keratin filament binding                                               | 4.53 | 0.02 |
| 390 | CALM3        | calmodulin 3 (phosphorylase kinase, delta)                                          | 4.52 | 0.02 |
| 391 | GOLGA8F      | golgin A8 family, member F                                                          | 4.52 | 0.02 |
| 392 | RSPH4A       | radial spoke head 4 homolog A (Chlamydomonas)                                       | 4.50 | 0.04 |
| 393 | TMEM41A      | transmembrane protein 41A                                                           | 4.48 | 0.02 |
| 394 | LOC101928068 | uncharacterized LOC101928068                                                        | 4.47 | 0.02 |
| 395 | RAP2C-AS1    | RAP2C antisense RNA 1                                                               | 4.46 | 0.02 |
| 396 | C17orf100    | chromosome 17 open reading frame 100                                                | 4.46 | 0.02 |
| 397 | RSU1         | Ras suppressor protein 1                                                            | 4.46 | 0.02 |
| 398 | KIAA1804     | mixed lineage kinase 4                                                              | 4.42 | 0.02 |
| 399 | ZACN         | zinc activated ligand-gated ion channel                                             | 4.41 | 0.02 |
| 400 | DTWD2        | DTW domain containing 2                                                             | 4.40 | 0.02 |
| 401 | C9orf66      | chromosome 9 open reading frame 66                                                  | 4.39 | 0.02 |
| 402 | C6orf52      | chromosome 6 open reading frame 52                                                  | 4.38 | 0.04 |
| 403 | NGRN         | neugrin, neurite outgrowth associated                                               | 4.38 | 0.02 |
| 404 | CCND2        | cyclin D2                                                                           | 4.35 | 0.02 |
| 405 | lnc-NDFIP1-1 | lnc-NDFIP1-1:1                                                                      | 4.35 | 0.02 |
| 406 | SPATA5       | spermatogenesis associated 5                                                        | 4.34 | 0.04 |
| 407 | FXR2         | fragile X mental retardation, autosomal homolog 2                                   | 4.34 | 0.02 |
| 408 | LRRC42       | leucine rich repeat containing 42                                                   | 4.33 | 0.02 |
| 409 | NAA40        | N(alpha)-acetyltransferase 40, NatD catalytic subunit                               | 4.33 | 0.02 |
| 410 | SSX2         | synovial sarcoma, X breakpoint 2                                                    | 4.32 | 0.02 |
| 411 | WDR19        | WD repeat domain 19                                                                 | 4.31 | 0.02 |
| 412 | ATF2         | activating transcription factor 2                                                   | 4.31 | 0.02 |
| 413 | PRR11        | proline rich 11                                                                     | 4.30 | 0.02 |
| 414 | XRCC6P5      | X-ray repair complementing defective repair in Chinese hamster cells 6 pseudogene 5 | 4.29 | 0.02 |
| 415 | TNRC6C       | trinucleotide repeat containing 6C                                                  | 4.23 | 0.02 |
| 416 | HMG5         | high mobility group nucleosome binding domain 5                                     | 4.19 | 0.02 |
| 417 | KIAA1257     | KIAA1257                                                                            | 4.19 | 0.02 |

|     |          |                                                    |      |      |
|-----|----------|----------------------------------------------------|------|------|
| 418 | FLCN     | folliculin                                         | 4.18 | 0.04 |
| 419 | PHTF1    | putative homeodomain transcription factor 1        | 4.15 | 0.02 |
| 420 | MPC2     | mitochondrial pyruvate carrier 2                   | 4.13 | 0.02 |
| 421 | BEND7    | BEN domain containing 7                            | 4.13 | 0.04 |
| 422 | ZNF35    | zinc finger protein 35                             | 4.10 | 0.02 |
| 423 | RSPH9    | radial spoke head 9 homolog (Chlamydomonas)        | 4.09 | 0.04 |
| 424 | IER3IP1  | immediate early response 3 interacting protein 1   | 4.08 | 0.02 |
| 425 | ANKRD9   | ankyrin repeat domain 9                            | 4.07 | 0.02 |
| 426 | ABHD12   | abhydrolase domain containing 12                   | 4.07 | 0.02 |
| 427 | ZNF345   | zinc finger protein 345                            | 4.06 | 0.02 |
| 428 | UBE2M    | ubiquitin-conjugating enzyme E2M                   | 4.06 | 0.02 |
| 429 | SEC14L1  | SEC14-like 1 (S. cerevisiae)                       | 4.05 | 0.04 |
| 430 | SENP8    | SUMO/sentrin specific peptidase family member 8    | 4.04 | 0.02 |
| 431 | SLC25A38 | solute carrier family 25, member 38                | 4.04 | 0.02 |
| 432 | CCL26    | chemokine (C-C motif) ligand 26                    | 4.04 | 0.04 |
| 433 | RPS2     | ribosomal protein S2                               | 4.03 | 0.02 |
| 434 | SCLY     | selenocysteinylase                                 | 4.03 | 0.02 |
| 435 | PTPN11   | protein tyrosine phosphatase, non-receptor type 11 | 4.02 | 0.02 |
| 436 | LMF1     | lipase maturation factor 1                         | 3.99 | 0.04 |
| 437 | NTF3     | neurotrophin 3                                     | 3.97 | 0.04 |
| 438 | ZRANB3   | zinc finger, RAN-binding domain containing 3       | 3.95 | 0.02 |
| 439 | CECR1    | cat eye syndrome chromosome region, candidate 1    | 3.94 | 0.02 |
| 440 | ERCC4    | excision repair cross-complementation group 4      | 3.93 | 0.02 |
| 441 | C8orf31  | chromosome 8 open reading frame 31                 | 3.88 | 0.02 |
| 442 | PRKCI    | protein kinase C, iota                             | 3.87 | 0.02 |
| 443 | LIG1     | ligase I, DNA, ATP-dependent                       | 3.86 | 0.02 |
| 444 | GPR135   | G protein-coupled receptor 135                     | 3.85 | 0.04 |
| 445 | ZSCAN30  | zinc finger and SCAN domain containing 30          | 3.85 | 0.04 |
| 446 | UEVLD    | UEV and lactate/malate dehydrogenase domains       | 3.84 | 0.02 |

|     |             |                                                                  |      |      |
|-----|-------------|------------------------------------------------------------------|------|------|
| 447 | LINC00839   | long intergenic non-protein coding RNA 839                       | 3.84 | 0.04 |
| 448 | HERC4       | HECT and RLD domain containing E3 ubiquitin protein ligase 4     | 3.83 | 0.02 |
| 449 | UVRAG       | UV radiation resistance associated                               | 3.83 | 0.02 |
| 450 | USP38       | ubiquitin specific peptidase 38                                  | 3.77 | 0.02 |
| 451 | ING3        | inhibitor of growth family, member 3                             | 3.77 | 0.02 |
| 452 | THEM6       | thioesterase superfamily member 6                                | 3.77 | 0.02 |
| 453 | CNNM2       | cyclin and CBS domain divalent metal cation transport mediator 2 | 3.76 | 0.02 |
| 454 | TMEM159     | transmembrane protein 159                                        | 3.76 | 0.02 |
| 455 | HSPA13      | heat shock protein 70kDa family, member 13                       | 3.76 | 0.02 |
| 456 | PBLD        | phenazine biosynthesis-like protein domain containing            | 3.73 | 0.02 |
| 457 | MCM4        | minichromosome maintenance complex component 4                   | 3.73 | 0.02 |
| 458 | FLCN        | folliculin                                                       | 3.72 | 0.02 |
| 459 | CDKN2AIPNL  | CDKN2A interacting protein N-terminal like                       | 3.71 | 0.02 |
| 460 | SP4         | Sp4 transcription factor                                         | 3.66 | 0.02 |
| 461 | PLCG2       | phospholipase C, gamma 2 (phosphatidylinositol-specific)         | 3.63 | 0.02 |
| 462 | MED16       | mediator complex subunit 16                                      | 3.63 | 0.04 |
| 463 | ZNF530      | zinc finger protein 530                                          | 3.60 | 0.02 |
| 464 | ANKRD20A12P | ankyrin repeat domain 20 family, member A12, pseudogene          | 3.59 | 0.02 |
| 465 | TRIM32      | tripartite motif containing 32                                   | 3.58 | 0.02 |
| 466 | USP33       | ubiquitin specific peptidase 33                                  | 3.57 | 0.02 |
| 467 | ZNF548      | zinc finger protein 548                                          | 3.57 | 0.02 |
| 468 | AGAP1       | ArfGAP with GTPase domain, ankyrin repeat and PH domain 1        | 3.57 | 0.02 |
| 469 | FZD5        | frizzled class receptor 5                                        | 3.55 | 0.04 |
| 470 | KLKB1       | kallikrein B, plasma (Fletcher factor) 1                         | 3.55 | 0.04 |
| 471 | FMO4        | flavin containing monooxygenase 4                                | 3.54 | 0.02 |
| 472 | DIS3L2      | DIS3 like 3'-5' exoribonuclease 2                                | 3.53 | 0.02 |

|     |               |                                                              |       |      |
|-----|---------------|--------------------------------------------------------------|-------|------|
| 473 | ITPR2         | inositol 1,4,5-trisphosphate receptor, type 2                | 3.53  | 0.02 |
| 474 | DNAH9         | dynein, axonemal, heavy chain 9                              | 3.52  | 0.04 |
| 475 | ACTR3B        | ARP3 actin-related protein 3 homolog B (yeast)               | 3.52  | 0.02 |
| 476 | ZNF841        | zinc finger protein 841                                      | 3.52  | 0.02 |
| 477 | GTF2I         | general transcription factor Iii                             | 3.48  | 0.04 |
| 478 | NDUFB7        | NADH dehydrogenase (ubiquinone) 1 beta subcomplex, 7, 18kDa  | -3.48 | 0.04 |
| 479 | AP3D1         | adaptor-related protein complex 3, delta 1 subunit           | 3.47  | 0.02 |
| 480 | GTPBP1        | GTP binding protein 1                                        | 3.47  | 0.02 |
| 481 | KRT80         | keratin 80, type II                                          | 3.44  | 0.04 |
| 482 | NDUFAF6       | NADH dehydrogenase (ubiquinone) complex I, assembly factor 6 | 3.43  | 0.02 |
| 483 | EIF4H         | eukaryotic translation initiation factor 4H                  | 3.41  | 0.02 |
| 484 | ZFAND3        | zinc finger, AN1-type domain 3                               | 3.40  | 0.02 |
| 485 | TUBGCP5       | tubulin, gamma complex associated protein 5                  | 3.38  | 0.02 |
| 486 | PWWP2B        | PWWP domain containing 2B                                    | -3.37 | 0.04 |
| 487 | TCEAL7        | transcription elongation factor A (SII)-like 7               | 3.37  | 0.02 |
| 488 | TPGS2         | tubulin polyglutamylase complex subunit 2                    | 3.35  | 0.02 |
| 489 | RFPL1S        | RFPL1 antisense RNA 1                                        | 3.34  | 0.04 |
| 490 | ZNF197        | zinc finger protein 197                                      | 3.32  | 0.02 |
| 491 | RABL3         | RAB, member of RAS oncogene family-like 3                    | 3.31  | 0.02 |
| 492 | lnc-TMEM109-1 | lnc-TMEM109-1:1                                              | 3.31  | 0.02 |
| 493 | APP           | amyloid beta (A4) precursor protein                          | 3.31  | 0.02 |
| 494 | IFITM2        | interferon induced transmembrane protein 2                   | 3.31  | 0.02 |
| 495 | C5orf24       | chromosome 5 open reading frame 24                           | 3.30  | 0.04 |
| 496 | GORAB         | golgin, RAB6-interacting                                     | 3.28  | 0.02 |
| 497 | ELL3          | elongation factor RNA polymerase II-like 3                   | 3.27  | 0.04 |
| 498 | PTPRN2        | protein tyrosine phosphatase, receptor type, N polypeptide 2 | 3.27  | 0.02 |

|     |              |                                                                                   |      |      |
|-----|--------------|-----------------------------------------------------------------------------------|------|------|
| 499 | ZC3H12D      | zinc finger CCCH-type containing 12D                                              | 3.25 | 0.02 |
| 500 | TRAM1        | translocation associated membrane protein 1                                       | 3.24 | 0.02 |
| 501 | UBE2H        | ubiquitin-conjugating enzyme E2H                                                  | 3.24 | 0.02 |
| 502 | ZNF16        | zinc finger protein 16                                                            | 3.24 | 0.02 |
| 503 | CLIP2        | CAP-GLY domain containing linker protein 2                                        | 3.23 | 0.02 |
| 504 | BAP1         | BRCA1 associated protein-1 (ubiquitin carboxy-terminal hydrolase)                 | 3.22 | 0.02 |
| 505 | VCX3A        | variable charge, X-linked 3A                                                      | 3.21 | 0.02 |
| 506 | TTF2         | transcription termination factor, RNA polymerase II                               | 3.20 | 0.04 |
| 507 | ALDH6A1      | aldehyde dehydrogenase 6 family, member A1                                        | 3.19 | 0.02 |
| 508 | LOC101927418 | uncharacterized LOC101927418                                                      | 3.19 | 0.02 |
| 509 | PIGG         | phosphatidylinositol glycan anchor biosynthesis, class G                          | 3.19 | 0.04 |
| 510 | ARHGAP27     | Rho GTPase activating protein 27                                                  | 3.18 | 0.02 |
| 511 | ARRDC1-AS1   | ARRDC1 antisense RNA 1                                                            | 3.16 | 0.04 |
| 512 | DOK2         | docking protein 2, 56kDa                                                          | 3.15 | 0.02 |
| 513 | C9orf3       | chromosome 9 open reading frame 3                                                 | 3.14 | 0.02 |
| 514 | MACROD2      | MACRO domain containing 2                                                         | 3.14 | 0.04 |
| 515 | HPCAL1       | hippocalcin-like 1                                                                | 3.13 | 0.04 |
| 516 | FBXO31       | F-box protein 31                                                                  | 3.12 | 0.02 |
| 517 | SLC9B2       | solute carrier family 9, subfamily B (NHA2, cation proton antiporter 2), member 2 | 3.11 | 0.02 |
| 518 | lnc-TUBA1C-1 | lnc-TUBA1C-1:3                                                                    | 3.11 | 0.02 |
| 519 | BAG3         | BCL2-associated athanogene 3                                                      | 3.10 | 0.02 |
| 520 | NUDCD3       | NudC domain containing 3                                                          | 3.09 | 0.02 |
| 521 | BEND7        | BEN domain containing 7                                                           | 3.08 | 0.04 |
| 522 | CRHBP        | corticotropin releasing hormone binding protein                                   | 3.07 | 0.02 |
| 523 | MUS81        | MUS81 structure-specific endonuclease subunit                                     | 3.07 | 0.02 |
| 524 | FNDC3A       | fibronectin type III domain containing 3A                                         | 3.06 | 0.04 |
| 525 | DBF4B        | DBF4 zinc finger B                                                                | 3.04 | 0.02 |
| 526 | SIPA1        | signal-induced proliferation-associated 1                                         | 3.03 | 0.04 |



**Supplementary Table 2:** List of primers for genes selected from microarray analysis

followed by Enrichment analysis along with housekeeping genes

S, sense strand; as, antisense strand; \*Housekeeping genes

| <b>Gene Symbol (Gene Name)</b>                                   | <b>Primer sequences</b>                               |
|------------------------------------------------------------------|-------------------------------------------------------|
| ACTB* (Beta-Actin)                                               | CCTGGTGCTCCGTCTTAG (s)<br>GATGCCTTCCTTGTCTTGG (as)    |
| B2M* (Beta-2-Microglobulin)                                      | GCGTGACATTAAGGAGAAG (s)<br>GAAGGAAGGCTGGAAGAG (as)    |
| GAPDH* (Glyceraldehyde-3-Phosphate Dehydrogenase)                | GTCTGCTTCTCTGCTGTAG (s)<br>AGGCTGTTGTCATACTTCTC (as)  |
| TNFRSF1A ( Tumor Necrosis Factor Receptor Superfamily Member 1A) | TTGAAGGAACTACTACTAAGCC (s)<br>AGGTGAAGGTGGAAGTGG (as) |
| CASP9 (Caspase 9)                                                | GCGAACTAACAGGCAAGC (s)<br>AAGAGCACCGACATCACC (as)     |

**Supplementary Table 3:** Summary of the subject profiles and RNA quality used for array analysis

| Subject Identification Number | Age (year) | Height (cm) | Weight (kg) | BMI  | GOLD stage severity <sup>a</sup> | MMRC <sup>b</sup> | 6MWD (metres) <sup>c</sup> | BODE index <sup>d</sup> | Pack Years <sup>e</sup> | Ex-smokers <sup>f</sup> | FEV <sub>1</sub> (% predicted) | FVC (% predicted) | FEV1/FVC | RIN Score* |
|-------------------------------|------------|-------------|-------------|------|----------------------------------|-------------------|----------------------------|-------------------------|-------------------------|-------------------------|--------------------------------|-------------------|----------|------------|
| COPDS1                        | 56         | 162         | 48          | 18.1 | III                              | 1                 | 281                        | 5                       | 36                      | -                       | 31                             | 44                | 53.00    | 9.1        |
| COPDS2                        | 52         | 172         | 62          | 21.0 | III                              | 2                 | 357                        | 3                       | 32                      | -                       | 46                             | 64                | 55.41    | N/A**      |
| COPDS3                        | 55         | 170         | 71          | 24.6 | II                               | 1                 | 440                        | 0                       | 29                      | -                       | 66                             | 73                | 56.08    | 8.6        |
| COPDS4                        | 67         | 157         | 48          | 19.4 | III                              | 3                 | 346                        | 6                       | 30                      | -                       | 45                             | 61                | 62.00    | 9.2        |
| COPDS5                        | 46         | 167         | 48          | 17.4 | III                              | 2                 | 268                        | 6                       | 37                      | -                       | 32                             | 52                | 52.00    | 8.2        |
| COPD EXS1                     | 65         | 161         | 55          | 21.2 | III                              | 3                 | 300                        | 5                       | 40                      | 7                       | 37                             | 65                | 53.00    | N/A**      |
| COPD EXS2                     | 60         | 167         | 61          | 21.9 | II                               | 1                 | 401                        | 1                       | 31                      | 4                       | 61                             | 71                | 68.19    | 5.0**      |
| COPD EXS3                     | 55         | 157         | 45          | 18.3 | III                              | 3                 | 369                        | 5                       | 37                      | 5.5                     | 41                             | 77                | 47.35    | 8.7        |
| COPD EXS4                     | 69         | 156         | 57          | 23.4 | II                               | 2                 | 447                        | 1                       | 28                      | 9                       | 65                             | 44                | 60.00    | 8.5        |
| COPD EXS5                     | 42         | 161         | 50          | 19.3 | III                              | 3                 | 258                        | 6                       | 39                      | 4                       | 37                             | 56                | 68.00    | 7.0**      |
| COPD EXS6                     | 58         | 159         | 57          | 22.5 | III                              | 3                 | 276                        | 5                       | 50                      | 6.5                     | 37                             | 53                | 55.18    | 6.1**      |



|            |    |     |    |      |     |   |     |   |    |    |     |      |       |       |
|------------|----|-----|----|------|-----|---|-----|---|----|----|-----|------|-------|-------|
| COPD EXS7  | 65 | 161 | 55 | 21.2 | III | 3 | 172 | 7 | 37 | 2  | 33  | 54   | 44.21 | N/A** |
| COPD EXS8  | 69 | 165 | 53 | 19.5 | II  | 3 | 204 | 6 | 21 | 8  | 50  | 58   | 66.00 | N/A** |
| COPD EXS9  | 64 | 168 | 69 | 24.6 | II  | 1 | 488 | 1 | 14 | 10 | 61  | 84   | 58.00 | 10.0  |
| COPD EXS10 | 60 | 167 | 53 | 19.0 | III | 3 | 301 | 7 | 36 | 3  | 35  | 56   | 53.24 | 2.2** |
| COPD EXS11 | 70 | 168 | 70 | 24.9 | III | 3 | 318 | 6 | 40 | 6  | 33  | 54   | 44.21 | 9.8   |
| CS1        | 55 | 160 | 65 | 25.4 | -   | 1 | 586 | 0 | 13 | -  | 96  | 99   | 80.22 | 9.6   |
| CS2        | 52 | 168 | 68 | 24.1 | -   | 0 | 581 | 0 | 15 | -  | 80  | 82   | 72.26 | N/A** |
| CS3        | 45 | 187 | 90 | 25.7 | -   | 0 | 609 | 0 | 10 | -  | 114 | 118  | 81.00 | 9.3   |
| CS4        | 48 | 165 | 73 | 26.8 | -   | 0 | 590 | 0 | 16 | -  | 85  | 84   | 75.30 | 6.7** |
| CS5        | 62 | 171 | 75 | 25.5 | -   | 2 | 596 | 1 | 20 | -  | 94  | 97   | 74.25 | 9.1   |
| CS6        | 35 | 172 | 82 | 28.0 | -   | 0 | 570 | 0 | 10 | -  | 84  | 84   | 84.00 | 1.0** |
| CS7        | 57 | 169 | 71 | 24.9 | -   | 1 | 440 | 0 | 12 | -  | 81  | 80   | 73.22 | 6.7** |
| CS8        | 46 | 166 | 68 | 24.7 | -   | 1 | 520 | 0 | 17 | -  | 89  | 94.2 | 78.00 | N/A** |
| CS9        | 64 | 164 | 70 | 26.0 | -   | 0 | 517 | 0 | 11 | -  | 82  | 91   | 76.27 | 8.1   |
| CNS1       | 47 | 165 | 92 | 33.8 | -   | 1 | 479 | 0 | -  | -  | 89  | 89   | 82.15 | 3.0** |
| CNS2       | 57 | 165 | 66 | 24.2 | -   | 0 | 606 | 0 | -  | -  | 85  | 89   | 80.00 | 7.7** |

|       |    |     |    |      |   |   |     |   |   |   |    |    |       |       |
|-------|----|-----|----|------|---|---|-----|---|---|---|----|----|-------|-------|
| CNS3  | 53 | 181 | 85 | 26.1 | - | 2 | 447 | 1 | - | - | 82 | 83 | 78.42 | 6.6** |
| CNS4  | 45 | 162 | 52 | 19.8 | - | 0 | 479 | 1 | - | - | 80 | 82 | 75.00 | 6.7** |
| CNS5  | 66 | 176 | 61 | 19.7 | - | 1 | 585 | 1 | - | - | 80 | 89 | 75.03 | 1.0** |
| CNS6  | 51 | 162 | 64 | 24.4 | - | 0 | 601 | 0 | - | - | 93 | 90 | 82.22 | 8.8   |
| CNS7  | 52 | 166 | 81 | 29.4 | - | 0 | 599 | 0 | - | - | 87 | 95 | 79.00 | N/A** |
| CNS8  | 49 | 163 | 73 | 27.5 | - | 0 | 564 | 0 | - | - | 86 | 97 | 77.28 | 4.0** |
| CNS9  | 47 | 176 | 74 | 23.9 | - | 0 | 524 | 0 | - | - | 87 | 88 | 84.00 | 8.5   |
| CNS10 | 54 | 177 | 83 | 26.5 | - | 0 | 618 | 0 | - | - | 84 | 82 | 74.00 | 5.2** |
| CNS11 | 49 | 180 | 53 | 16.4 | - | 0 | 596 | 1 | - | - | 80 | 85 | 80.00 | 6.7** |
| CNS12 | 50 | 174 | 79 | 26.1 | - | 0 | 520 | 0 | - | - | 85 | 83 | 76.12 | 6.7** |
| CNS13 | 61 | 168 | 86 | 30.5 | - | 1 | 517 | 0 | - | - | 88 | 89 | 81.00 | 1.0** |
| CNS14 | 53 | 164 | 67 | 24.9 | - | 0 | 509 | 0 | - | - | 82 | 86 | 78.09 | 2.8** |
| CNS15 | 38 | 165 | 65 | 23.9 | - | 0 | 595 | 0 | - | - | 88 | 88 | 85.00 | 9.0   |
| CNS16 | 50 | 160 | 60 | 23.4 | - | 1 | 509 | 0 | - | - | 84 | 88 | 80.15 | 8.9   |

COPDS, COPD Smoker; COPD EXS, COPD Ex smoker; CS, Control Smoker; CNS, Control Never Smoker; 6MWD, Six Minute Walk Distance; BODE, Body mass index, airflow Obstruction, Dyspnea and Exercise capacity; RIN, RNA Integrity Number; MMRC, Modified Medical Research Council; GOLD, Global Initiative for Obstructive Lung Diseases; BMI, Body Mass Index; NA, Not Available. <sup>a</sup>Based on the GOLD staging of COPD severity (GOLD Report). <sup>b</sup>Based on the Modified Medical Research Council Dyspnea Scale (mMRC Dyspnea scale questionnaire). <sup>c</sup>Based on standardized protocol (ATS Statement: Guidelines for the Six-Minute Walk Test). <sup>d</sup>Based on BODE Index for COPD Survival Prediction calculations (Celli et al. 2004; Mahler et al. 1988). <sup>e,f</sup> based on the report obtained from the subject. \*RIN score  $\geq$  8.0 was taken as cut-off value. \*\*Samples were not included in microarray experiments due to poor quality of RNA.
